1 **Title:** Peripheral neural synchrony in post-lingually deafened adult  
2 cochlear implant users

3 **Authors:** Shuman He<sup>1,3</sup>, MD, PhD; Jeffrey Skidmore<sup>1</sup>, PhD; Ian C. Bruce<sup>2</sup>,  
4 PhD; Jacob J. Oleson<sup>4</sup>, PhD; Yi Yuan<sup>1</sup>, PhD

5 **Affiliations:** <sup>1</sup>Department of Otolaryngology – Head and Neck Surgery, The  
6 Ohio State University, 915 Olentangy River Road, Columbus, OH  
7 43212

8 <sup>2</sup>Department of Electrical & Computer Engineering, McMaster  
9 University, Hamilton, ON, L8S 4K1, Canada

10 <sup>3</sup>Department of Audiology, Nationwide Children’s Hospital, 700  
11 Children’s Drive, Columbus, OH 43205

12 <sup>4</sup>Department of Biostatistics, The University of Iowa, Iowa City, IA  
13 52242

14 **Correspondence:** Shuman He, MD, PhD  
15 Eye and Ear Institute  
16 Department of Otolaryngology – Head and Neck Surgery  
17 The Ohio State University  
18 915 Olentangy River Road, Suite 4000  
19 Phone: 614-293-5963  
20 Fax: 614-293-7292  
21 Email: Shuman.He@osumc.edu

22 **Conflict of Interest:** None.

23 **Source of Funding:** This work was supported by grants from the National Institutes of  
24 Health awarded to SH [grant numbers 1R01 DC016038, 1R01  
25 DC017846, R21 DC019458] and a NSERC Discovery Grant  
26 awarded to ICB [grant number RGPIN-2018-05778].

27 **Author Contributions:** SH designed this study, participated in data analysis, drafted  
28 and approved the final version of this paper. JS participated in data  
29 collection and data analysis, provided critical comments, and  
30 approved the final version of this paper. IB participated in study  
31 design, provided critical comments, and approved the final version  
32 of this paper. JO conducted statistical analyses, provide critical  
33 comments, and approved the final version of this paper. YY  
34 participated in data collection, provided critical comments, and  
35 approved the final version of this paper.

36

37

38 **ABSTRACT**

39 **Objective:** This paper reports a noninvasive method for quantifying neural synchrony in  
40 the cochlear nerve (i.e., peripheral neural synchrony) in cochlear implant (CI) users, which  
41 allows for evaluating this physiological phenomenon in human CI users for the first time  
42 in the literature. In addition, this study assessed how peripheral neural synchrony was  
43 correlated with temporal resolution acuity and speech perception outcomes measured in  
44 quiet and in noise in post-lingually deafened adult CI users. It tested the hypothesis that  
45 peripheral neural synchrony was an important factor for temporal resolution acuity and  
46 speech perception outcomes in noise in post-lingually deafened adult CI users.

47 **Design:** Study participants included 24 post-lingually deafened adult CI users with a  
48 Cochlear™ Nucleus® device. Three study participants were implanted bilaterally, and  
49 each ear was tested separately. For each of the 27 implanted ears tested in this study,  
50 400 sweeps of the electrically evoked compound action potential (eCAP) were measured  
51 at four electrode locations across the electrode array. Peripheral neural synchrony was  
52 quantified at each electrode location using the phase locking value (PLV), which is a  
53 measure of trial-by-trial phase coherence among eCAP sweeps/trials. Temporal  
54 resolution acuity was evaluated by measuring the within-channel gap detection threshold  
55 (GDT) using a three-alternative, forced-choice procedure in a subgroup of 20 participants  
56 (23 implanted ears). For each ear tested in these participants, GDTs were measured at  
57 two electrode locations with a large difference in PLVs. For 26 implanted ears tested in  
58 23 participants, speech perception performance was evaluated using Consonant-  
59 Nucleus-Consonant (CNC) word lists presented in quiet and in noise at signal-to-noise  
60 ratios (SNRs) of +10 and +5 dB. Linear Mixed effect Models were used to evaluate the

61 effect of electrode location on the PLV and the effect of the PLV on GDT after controlling  
62 for the stimulation level effects. Pearson product-moment correlation tests were used to  
63 assess the correlations between PLVs, CNC word scores measured in different  
64 conditions, and the degree of noise effect on CNC word scores.

65 **Results:** There was a significant effect of electrode location on the PLV after controlling  
66 for the effect of stimulation level. There was a significant effect of the PLV on GDT after  
67 controlling for the effects of stimulation level, where higher PLVs (greater synchrony) led  
68 to lower GDTs (better temporal resolution acuity). PLVs were not significantly correlated  
69 with CNC word scores measured in any listening condition or the effect of competing  
70 background noise presented at a SNR of +10 dB on CNC word scores. In contrast, there  
71 was a significant negative correlation between the PLV and the degree of noise effect on  
72 CNC word scores for a competing background noise presented at a SNR of +5 dB, where  
73 higher PLVs (greater synchrony) correlated with smaller noise effects on CNC word  
74 scores.

75 **Conclusions:** This newly developed method can be used to assess peripheral neural  
76 synchrony in CI users, a physiological phenomenon that has not been systematically  
77 evaluated in electrical hearing. Poorer peripheral neural synchrony leads to lower  
78 temporal resolution acuity and is correlated with a larger detrimental effect of competing  
79 background noise presented at a SNR of 5 dB on speech perception performance in post-  
80 linguually deafened adult CI users.

81 **Key Words:** cochlear implants, cochlear nerve, neural synchrony, speech perception,  
82 temporal resolution acuity

83

## 84 INTRODUCTION

85 While many cochlear implant (CI) users can achieve excellent listening outcomes  
86 in quiet, speech recognition in background noise remains a significant challenge  
87 (Eisenberg et al., 2016; Torkildsen et al., 2019; Zaltz et al., 2020). The neural mechanisms  
88 underlying the observed speech perception deficits in noise in CI users remain unknown.  
89 In acoustic hearing, discharge synchronization of cochlear nerve (CN) fibers has been  
90 shown to play a critical role in neural representation of speech sounds presented in noise  
91 in animal models (e.g., Delgutte & Kiang, 1984; Heeringa & Koppl, 2022; Sachs et al.,  
92 1983). Simulation results from computational models demonstrated the importance of  
93 synchronized neural firing from CN fibers for robust encoding of consonants in spectro-  
94 temporally modulated background noises (Bruce et al., 2013; Viswanathan et al., 2022).  
95 These simulation results also showed that poor neural synchrony in the CN (i.e.,  
96 peripheral neural synchrony) results in smeared neural representation of temporal  
97 envelope cues, which leads to deficits in processing these cues (Zeng et al., 2005; Zeng  
98 et al., 1999). Aligned with these results from animal models and computational  
99 simulations, listeners with poor peripheral neural synchrony (e.g., patients with auditory  
100 neuropathy spectrum disorder and elderly listeners) have temporal processing deficits  
101 and show excessive difficulties in understanding speech in noise (e.g., Harris et al., 2021;  
102 Kraus et al., 2000; Rance, 2005; Zeng et al., 2005). Overall, these results demonstrate  
103 the importance of peripheral neural synchrony for temporal processing and speech  
104 perception in noise in acoustic hearing.

105 Deteriorations in anatomical structures of the CN in CI patients have been well  
106 established based on the histological results of human temporal bone studies (e.g., Di

107 Stadio et al., 2020; Fayad et al., 1991; Fayad & Linthicum, 2006; Heshmat et al., 2020;  
108 Kumar et al., 2022; Kusunoki et al., 2004; Linthicum & Fayad, 2009; Makary et al., 2011;  
109 Merchant et al., 2005; Nadol, 1990, 1997; Nadol et al., 1989; Rask-Andersen et al., 2010;  
110 Suzuka & Schuknecht, 1988; Ungar et al., 2018; Wu et al., 2019; Xing et al., 2012). These  
111 deteriorations start with damages in the myelin sheath and peripheral axon degeneration  
112 (e.g., Heshmat et al., 2020; Kumar et al., 2022; Nadol, 1990; Wu et al., 2019; Xing et al.,  
113 2012). Damaged spiral ganglion neurons (SGNs) with only central axons (i.e., unipolar  
114 SGNs) can survive decades after peripheral axon loss (e.g., Kusunoki et al., 2004;  
115 Linthicum & Fayad, 2009; Nadol, 1990; Rask-Andersen et al., 2010) and still be activated  
116 by electrical stimulation (e.g., Javel & Shepherd, 2000; Shepherd & Hardie, 2001;  
117 Shepherd & Javel, 1997; Sly et al., 2007; van den Honert & Stypulkowski, 1984).  
118 Eventually, the SGN soma and the central axon degenerate, which leads to the  
119 disappearance of the entire SGN (e.g., Fayad et al., 1991; Fayad & Linthicum, 2006;  
120 Linthicum & Fayad, 2009; Suzuka & Schuknecht, 1988; Ungar et al., 2018). The number  
121 and the distribution of surviving SGNs, the number of bipolar vs unipolar SGNs, as well  
122 as the degree of axonal degeneration and demyelination of remaining SGNs, vary  
123 substantially along the cochlea within and across CI patients (Fayad et al., 1991; Fayad  
124 & Linthicum, 2006; Linthicum & Fayad, 2009; Merchant et al., 2005; Nadol, 1997).

125 Deteriorations in anatomical structures of the CN reduce its discharge  
126 synchronization (i.e., neural synchrony). Specifically, both axonal dystrophy and  
127 demyelination alter many neural properties, such as membrane capacitance and  
128 resistance, nodal leakage resistance, as well as nodal sodium and potassium channel  
129 permeability (e.g., Tasaki, 1955; Waxman & Ritchie, 1993). These changes cause a

130 reduction in the nodal current density, axonal spiking probability and propagation velocity,  
131 as well as an increase in temporal jitter, spike latency, and conduction vulnerability of  
132 individual CN fibers (e.g., Gonzalez-Gonzalez & Cazeveille, 2019; Heshmat et al., 2020;  
133 Kim et al., 2013; Tasaki, 1955). CN fibers with different degrees of axonal dystrophy and  
134 demyelination generate and conduct action potentials at different speeds, which reduces  
135 the synchronized discharge across the population of CN fibers (Kandel, 2002). Animals  
136 with more demyelination show greater reductions in neural synchrony in the CN (e.g., El-  
137 Badry et al., 2007). In electrical hearing, loss of the peripheral axon and altered  
138 membrane properties can also move the action potential initiation site distally to the SGN  
139 soma or central axon (e.g., Hartmann et al., 1984; Javel & Shepherd, 2000; van den  
140 Honert & Stypulkowski, 1984). Compared with responses initiated at peripheral axons,  
141 spikes initiated at central axons have less temporal dispersion or jitter (Javel & Shepherd,  
142 2000). The difference in the action potential initiation site among CN fibers could further  
143 reduce discharge synchronization across CN fibers. Due to the lack of noninvasive tools  
144 to evaluate neural synchrony in the CN to electrical stimulation in CI users in the past, our  
145 knowledge in this area is primarily based on the results showing the variance in the first  
146 spike latency after stimulus onset (i.e., temporal jitter) of individual CN fibers measured  
147 using single fiber recordings in animal models (e.g., Hartmann et al., 1984; Parkins, 1989;  
148 Shepherd & Hardie, 2001; Shepherd & Javel, 1997; Sly et al., 2007; van den Honert &  
149 Stypulkowski, 1984). How well this knowledge applies to human CI users remains  
150 unknown due to the differences in anatomical/morphometric and biophysical properties  
151 of CN fibers, as well as durations and etiologies of deafness between human listeners  
152 and experimental animals (Skidmore et al., 2022). In addition, these results do not provide

153 any information about discharge synchronization across electrically stimulated CN fibers  
154 or discharge synchronization of a group of CN fibers across repeated stimulations. To  
155 date, neural synchrony in the electrically stimulated CN in human listeners has not yet  
156 been evaluated and remains unknown. Its role in processing temporal cues and  
157 understanding speech in noise in CI users also remains unknown despite the rich  
158 literature showing its importance for these processes in acoustic hearing.

159 To address these critical knowledge gaps, we recently developed a noninvasive,  
160 *in vivo* method for assessing neural synchrony of a population of electrically stimulated  
161 CN fibers by quantifying the trial-to-trial phase coherence in the summated activity to  
162 electrical stimulation using electrophysiological measures of the electrically evoked  
163 compound action potential (eCAP). Using this new method, we studied the effect of  
164 peripheral neural synchrony on temporal resolution acuity by assessing the association  
165 between the degree of peripheral neural synchrony and within-channel gap detection  
166 threshold (GDT) measured using psychophysical procedures. The association between  
167 the degree of peripheral neural synchrony and Consonant-Nucleus-Consonant (CNC)  
168 word scores measured in quiet and in noise was also evaluated. These experiments were  
169 designed to test the hypothesis that peripheral neural synchrony is an important factor for  
170 temporal resolution acuity and speech perception outcomes in noise in post-lingually  
171 deafened adult CI users.

## 172 **MATERIALS AND METHODS**

### 173 **Study Participants**

174 This study included 24 (14 Female, 10 Male) post-lingually deafened adult CI users  
175 ranging in age from 36.8 to 84.0 years (mean: 63.7 years, SD: 12.8 years). All study



176 participants were native speakers of American English and used a Cochlear™ Nucleus®  
177 device (Cochlear Ltd, Macquarie, NSW, Australia) with a full electrode insertion in the test  
178 ear, as confirmed based on post-operative, high-resolution computerized tomography  
179 scans. Participants A3, A5, and A12 were implanted bilaterally. For these three  
180 participants, each ear was tested separately. None of these participants has any  
181 functional acoustic hearing in either ear. eCAPs were measured in each of 27 ears tested  
182 in these 24 participants. Participant A16 was unable to participate in the speech  
183 perception evaluation. Participants A10, A16, A18 and A20 were not able to participate in  
184 psychophysical measures of GDT due to their limited availabilities. As a result, speech  
185 perception was evaluated for each of 26 ears tested in 23 participants. Psychophysical  
186 GDTs were measured at two CI electrodes in each of 23 ears tested in 20 participants.  
187 Detailed participant demographic information and the experiments that each participant  
188 completed are provided in Table 1. Written informed consent was obtained from all study  
189 participants at the time of data collection. The study was approved by the Biomedical  
190 Institutional Review Board (IRB) at The Ohio State University (IRB study #: 2017H0131).

191 [Insert Table 1 about here](#)

## 192 **Stimuli**

193 For eCAP recording, the stimulus was a charge-balanced, cathodic-leading,  
194 biphasic pulse with an interphase gap of 7  $\mu$ s and a pulse phase duration of 25  $\mu$ s/phase.  
195 For measuring psychophysical GDT, the stimulus was a train of biphasic pulses with the  
196 same characteristics as those of the single-pulse stimulus that was presented for 500 ms  
197 at a stimulation rate of 900 pulses per second (pps) per channel. For both measures, the

198 stimulus was delivered to individual CI electrodes in a monopolar-coupled stimulation  
199 mode via an N6 sound processor interfaced with a programming pod.

## 200 **Behavioral C Level Measures**

201 The maximum comfortable level (i.e., the C level) for each type of stimulus was  
202 determined using an ascending procedure. In this procedure, study participants were  
203 instructed to use a visual loudness rating scale [scale of 1-10, where 1 is “barely audible”  
204 and 10 is “very uncomfortable”] to indicate when the sound reached the maximum comfort  
205 level (rating of 8). Stimulation was first presented at a relatively low level and gradually  
206 increased in steps of 5 clinical units (CUs) until a loudness rating of 7 was reached. Then,  
207 stimulation was increased in steps of 1-2 CUs until a rating of 8 (“maximal comfort”) was  
208 reached. The C level was measured for each type of stimulation delivered to each test CI  
209 electrode for each participant.

210 For the single-pulse stimulation used for eCAP recording, the stimulus was  
211 presented to individual CI electrodes using the “Stimulation Only” mode in the Advanced  
212 Neural Response Telemetry (NRT) function implemented in the Custom Sound EP (v.  
213 6.0) commercial software (Cochlear Ltd, Macquarie, NSW, Australia) software. Due to the  
214 challenge of reliably rating loudness for an extremely brief single pulse, the C level was  
215 determined for a group of five pulses presented at 15 Hz. This is a standard clinical  
216 practice for determining the C levels during the programming process. For the pulse-train  
217 stimulation, the stimulus was presented to individual CI electrodes using a custom script  
218 prepared using Nucleus Interface Communicator Routine Library (NIC v. 4.3.1) (Cochlear  
219 Ltd, Macquarie, NSW, Australia).

## 220 **eCAP Measurements**

221           The eCAP recordings were obtained using the NRT function implemented in the  
222 Custom Sound EP (v. 6.0) commercial software (Cochlear Ltd, Macquarie, NSW,  
223 Australia). The eCAP was measured at individual CI electrode locations using a two-pulse  
224 forward-masking-paradigm (Brown et al., 1990). In this paradigm, the masker and the  
225 probe pulse were presented to the test electrode at the participants' C level and 10 CUs  
226 below the C level, respectively. The stimulation was presented 400 times using a probe  
227 rate of 15 Hz to minimize the potential effect of long-term adaptation on the eCAP (Clay  
228 & Brown, 2007). The number of trials was chosen to be 400 because preliminary analyses  
229 indicated that this number of trials could ensure accurate estimation of neural synchrony  
230 in the CN while maintaining a feasible recording time (Skidmore et al., 2023a). Results of  
231 one of our previous studies have demonstrated that using electrophysiological results  
232 measured at single CI electrode locations to correlate with auditory perception outcomes  
233 in CI users can lead to inaccurate, if not wrong, conclusions (He et al., 2023). In  
234 comparison, the averaged results across multiple testing electrode locations provide a  
235 better representation of overall neural function than the result measured at any individual  
236 CI electrode locations. Based on these results, four electrodes across the electrode array  
237 were tested for each participant to get an estimate of overall CN function while maintaining  
238 a feasible testing time. The default testing electrodes were electrodes 3, 9, 15, and 21.  
239 Alternate electrodes were tested in cases where there was an open- or short-circuit at the  
240 default electrode locations. The electrodes tested for each participant are listed in Table  
241 1. Other parameters used to record the eCAP included a recording electrode located two  
242 electrodes away apically from the stimulating electrode except for electrode 21 which was

243 recorded at electrode 19, a 122- $\mu$ s recording delay, an amplifier gain of 50 dB, and a  
244 sampling rate of 20,492 Hz.

## 245 **Measure of Neural Synchrony**

246 Peripheral neural synchrony at individual CI electrode locations was evaluated  
247 based on 400 individual sweeps (trials) of the eCAP. Neural synchrony was quantified  
248 using an index named the phase locking value (PLV) which is a measure of trial-to-trial  
249 phase coherence among the 400 eCAP sweeps. The PLV is a unitless quantity that  
250 ranges from 0 to 1. It quantifies the degree of synchrony in neural responses generated  
251 by target CN fibers across multiple stimulation/trials. The PLV is influenced by temporal  
252 jitter in spike firing of individual CN fibers, discharge synchronization across the  
253 population of activated CN fibers, and discharge synchronization of a group of activated  
254 CN fibers across multiple stimulations. A PLV of 0 means that the distribution of phase  
255 across trials is uniform (i.e., the responses across trials are uncorrelated). The PLV is 1  
256 if phases across trials are perfectly correlated. As a result, larger PLVs indicate  
257 better/stronger neural synchrony in the CN. Mathematically, the PLV is the length of the  
258 vector formed by averaging the complex phase angles of each trial at individual  
259 frequencies obtained via time-frequency decomposition. Specifically, the PLV is  
260 calculated at a specific frequency and time window (i.e., frame) as

$$261 \quad PLV(f, t) = \left| \frac{1}{400} \sum_{k=1}^{400} \frac{F_k(f, t)}{|F_k(f, t)|} \right|$$

262 where  $F_k(f, t)$  is the spectral estimate (i.e., complex number representing the amplitude  
263 and phase of a sinusoid obtained from the short-time Fourier transform) of trial  $k$  at  
264 frequency  $f$  for the time window  $t$ . For this study, the time-frequency decomposition was

265 performed at six linearly spaced frequencies (788.2, 1576.3, 2364.4, 3152.6, 3941.0 and  
266 4729.2 Hz) with Hanning Fast Fourier Transform tapers, a pad-ratio of 2 and a frame size  
267 of 26 samples (1268.8  $\mu$ s) using the `newtimef` function (v. 2022.1) included in the  
268 MATLAB plugin EEGlab (Delorme & Makeig, 2004). For each CI electrode tested in each  
269 participant, a single PLV was obtained by averaging PLVs calculated at six frequencies  
270 for six partially overlapped frames with an onset-to-onset interval of 48.8  $\mu$ s between two  
271 adjacent frames within a time window of 1561.6  $\mu$ s. The use of six partially overlapped  
272 frames within the time window of interest allows for higher temporal resolution of the PLV,  
273 with PLV values in the early frames capturing the degree of synchrony in the low-latency  
274 spikes and values in the later frames being dependent on synchrony in the longer-latency  
275 spikes.

276 The parameters used in PLV calculation were selected based on morphological  
277 characteristics of the eCAP measured in human CI users and the sampling rate offered  
278 by CI manufacturers for eCAP recording. Specifically, the eCAP recorded in human CI  
279 users consists of one negative peak (N1) within a time window of 0.2 – 0.4 ms after  
280 stimulus onset followed by a positive peak (P2) occurring around 0.6 – 0.8 ms (for a  
281 review, see He et al., 2017). As a result, the longest inter-peak latency of the eCAP in  
282 human listeners is 600  $\mu$ s. Using this duration as the half width of the sinusoid included  
283 in Fast Fourier Transform analysis and the sampling rate of 20,492 Hz offered by  
284 Cochlear™ Nucleus® device for measuring the eCAP, the frame size was determined to  
285 be 1268.8  $\mu$ s in time which included 26 samples ( $1268.8/48.8 = 26$ ). As a result, six  
286 frames with an onset-to-onset interval of 48.8  $\mu$ s between two adjacent frames cover the  
287 entire recording window [ $(1561.6-1268.8)/48.8 = 6$ ]. This frame size in time also

288 determines the lowest frequency ( $1/1268.8 \mu\text{s} = 788.1 \text{ Hz}$ ) used in the PLV calculation.  
289 The difference in the peak-to-baseline amplitude between the N1 and the P2 peak of the  
290 eCAP and the difference in their widths indicate a complex spectrum instead of a single  
291 fundamental frequency. A Fast Fourier Transform analysis was conducted to determine  
292 the frequency components of the averaged eCAPs over 400 sweeps measured in this  
293 study. Results showed that the harmonic frequency with one quarter of the amplitude  
294 measured at the fundamental frequency was 4482.6 Hz. As a result, the highest  
295 frequency used in PLV calculation was determined to be 4729.2 based on a spectral  
296 resolution of 788.1 Hz determined by the frame size in time. This frequency range (i.e.,  
297 788.1 – 4729.2 Hz) is higher than that used in Harris et al. (2018, 2021). This difference  
298 is caused by morphological differences between the eCAP and the compound action  
299 potential evoked by acoustic clicks.

300 Figures 1 and 2 use example data recorded at four CI electrode locations in  
301 participant A14 and in the right ear of participant A3 to illustrate this method. These  
302 examples were chosen because they included the lowest and the highest PLV measured  
303 in this study. Electrode number, the resulting PLV and the amplitude of the eCAP  
304 averaged over 400 sweeps/trials are indicated in each panel. It should be noted that these  
305 eCAPs were measured at the C level measured for each tested CI electrode in each  
306 participant. Therefore, the variation in stimulation levels used to measure the eCAP and  
307 the difference in corresponding eCAP amplitudes across different CI electrodes within  
308 each participant are due to participant-related factors instead of measurement bias.

309 [Insert Figure 1 about here](#)

310 [Insert Figure 2 about here](#)

## 311 **Psychophysical Measures of Gap Detection Threshold**

312 Within-channel GDTs were measured at two electrode locations with different  
313 PLVs in each of 23 ears tested in 20 participants (see Table 1 for the electrodes tested in  
314 each ear). Pulse trains with and without temporal gaps were presented in a three-  
315 alternative, forced-choice paradigm that incorporated a three-down, one-up adaptive  
316 strategy to estimate 79.4% correct on the psychometric function (Levitt, 1971). Individual  
317 trials consisted of three consecutive 500-ms listening intervals separated in time by 500  
318 -ms silent intervals. The stimulus presented in two of the three listening intervals was a  
319 500-ms pulse train without any interruption. The stimulus presented in the remaining  
320 listening interval, chosen at random, included a temporal gap centered at 250 ms of  
321 stimulation. The participant was asked to determine which of the three listening intervals  
322 included two sounds. Feedback on correct/incorrect choices was not provided to  
323 participants. The gap duration began at 64 ms and was shortened/lengthened based on  
324 the correctness of the participants' choice. The initial step size of the change in gap  
325 duration was 32 ms. This step changed by a factor of two after three consecutive correct  
326 responses or one incorrect response. The minimum and maximum gap durations  
327 permitted were 1 ms and 256 ms, respectively. The GDT was calculated as the average  
328 across two trials in which the mean gap duration over the last four (of twelve) reversals  
329 was calculated.

## 330 **Speech Measures**

331 Speech perception performance was evaluated separately for each implanted ear  
332 using Consonant-Nucleus-Consonant (CNC) word lists (Peterson & Lehiste, 1962)  
333 presented in quiet and in two noise conditions. All auditory stimuli were presented in a

334 sound-proof booth via a speaker placed one meter in front of the subject at zero degrees  
335 azimuth. The target stimulus was always presented at 60 dB sound pressure level (SPL).  
336 For the noise conditions, speech-shaped noise was presented concurrently with the target  
337 stimulus at 50 dB SPL and 55 dB SPL to create signal-to-noise ratios of +10 dB and +5  
338 dB, respectively.

### 339 **Statistical Analyses**

340 Descriptive statistics of PLVs measured at different electrode locations, GDTs and  
341 CNC word scores measured in different testing conditions and the degree of noise effect  
342 on CNC word scores which was quantified as the difference in CNC word scores  
343 measured in quiet and in noise were calculated, including the overall mean and standard  
344 deviation. Effects of electrode location and stimulation level on the PLV were assessed  
345 using a Linear Mixed effect Model (LMM) with electrode location and stimulation level as  
346 fixed effects. The effect of the PLV on GDT was evaluated using a LMM with the PLV, the  
347 stimulation level used to measure the GDT and the stimulation used to measure the PLV  
348 as fixed effects. All LMMs used a correlated regression model with an unstructured  
349 correlation matrix to account for repeated observations per participant. Estimations were  
350 obtained using restricted maximum likelihood with Satterthwaite degrees of freedom. The  
351 Tukey's Honest Significant Difference (Tukey's HSD) method was used to adjust for  
352 multiple comparisons. The difference in GDT between results measured at the two  
353 electrodes with different PLVs or stimulation levels were assessed using paired sample  
354 t-tests. One-tailed Pearson product-moment correlation tests with Bonferroni correction  
355 for multiple comparisons were used to assess the association of the PLV with CNC word  
356 scores measured in different conditions ( $\alpha = 0.017$ ), as well as with the change in CNC



357 word score with competing background noise (i.e., CNC word score measured in quiet -  
358 CNC word score measured in noise,  $\alpha = 0.025$ ). Using electrophysiological results  
359 measured at single CI electrode locations to correlate with auditory perception outcomes  
360 in CI users can lead to inaccurate conclusions (He et al., 2023). Therefore, for these  
361 correlation analyses, PLVs measured at all electrode locations were averaged together  
362 for each participant/ear to obtain an estimation of the overall peripheral neural synchrony  
363 within the cochlea and to minimize electrode-location related bias in study results. One-  
364 tailed Pearson product-moment correlation tests with Bonferroni correction for multiple  
365 comparisons were also used to assess the association between CNC word scores  
366 measured in quiet and the degree of noise effect on CNC word scores. The strength of  
367 correlation was determined based on values of the Pearson product-moment correlation  
368 coefficient ( $r$ ). Specifically, weak, moderate, and strong correlations were defined as  $r$   
369 values between 0 and 0.3 (0 and -0.3), between 0.3 and 0.7 (-0.3 and -0.7), and between  
370 0.7 and 1.0 (-0.7 and -1.0), respectively.

371 All statistical analyses for this study were performed using R software (v. 4.3.0) (R  
372 Core Team, 2021). All statistical models were fitted using the nlme package (Pinheiro et  
373 al., 2023) and pairwise comparisons were evaluated using the emmeans package (Lenth,  
374 2023).

## 375 **RESULTS**

### 376 **Neural Synchrony Along the Cochlea**

377 PLVs measured in this study ranged from 0.09 to 0.76 (mean: 0.55, SD: 0.22)  
378 across all electrodes tested. The means and standard deviations of PLVs measured at  
379 each of the four electrode locations are shown in Figure 3. The standard deviations at all

380 four electrode locations demonstrate variations in the PLV in CI users. In addition, a trend  
381 for the mean PLV to be different across electrode locations is observed. PLVs measured  
382 at apical electrode locations (i.e., electrodes 15 and 21) appear to be larger than those  
383 measured at more basal electrode locations (i.e., electrodes 3 and 9). The results of the  
384 LMM showing a significant effect of electrode location on the PLV ( $\chi^2_{(3)} = 17.11, p < .001$ )  
385 after controlling for the significant effect of stimulation level on the PLV ( $t_{(101)} = 3.90, p <$   
386  $.001$ ). The results of pairwise comparisons showed that PLVs measured at electrode 15  
387 were significantly larger than those measured at electrode 3 ( $t_{(26.9)} = -3.46, p = .009$ ) and  
388 electrode 9 ( $t_{(27.8)} = -3.62, p = .006$ ). The differences in the PLV measured between other  
389 electrode pairs did not reach a statistical significance. Detailed results of pairwise  
390 comparisons are listed in Table 2.

391 Insert Figure 3 about here

## 392 **Neural Synchrony and Temporal Acuity**

393 Figure 4 shows psychophysical GDTs measured at two electrode locations per test  
394 ear in 20 participants (23 ears) as a function of the PLV. For the two CI electrode locations  
395 tested in each of 19 ears in 18 participants, smaller GDTs were always measured at the  
396 electrode locations with higher PLVs. Results measured in A8, A24 and the right ear of  
397 A5 showed an opposite pattern. In the left ear of A12, GDTs measured at the two CI  
398 electrode locations with different PLVs were the same (5.75 ms). The result of a paired-  
399 samples t-test showed that GDTs measured at the electrode locations with larger PLVs  
400 were statistically significantly smaller than those measured at electrode locations with  
401 smaller PLVs ( $t_{(22)} = 2.25, p = .035$ ). The results of the LMM showed a significant effect  
402 of the PLV on GDT ( $t_{(42)} = -3.51, p = .001$ ) after controlling for the stimulation level of GDT

403  $(t(42) = -2.53, p = .015)$  and the stimulation level of the PLV ( $t(42) = 3.75, p < .001$ ), with  
404 larger PLVs leading to smaller GDTs.

405 Insert Figure 4 about here

406 Figure 5 shows psychophysical GDT results as a function of stimulation levels  
407 used to measure these GDTs. Smaller GDTs were measured at higher stimulation levels  
408 for the two CI electrode locations tested in each of 10 ears tested in 9 participants. Results  
409 measured in 11 ears tested in 11 participants showed an opposite relation between these  
410 two parameters. For A2, the stimulation levels used to measure GDTs at electrodes 3  
411 and 18 were the same (196 CU). For A12, using different stimulation levels at electrodes  
412 3 and 21 resulted in the same GDT (i.e., 5.75 ms). Overall, despite a significant  
413 stimulation level effect on GDT at a group level as shown in the LMM results, these data  
414 do not demonstrate a consistent association between stimulation level and GDT across  
415 participants, which differs from those shown in Figure 4. Consistent with these  
416 observations, the result of a paired-samples t-test showed that GDTs measured at the  
417 electrode locations with higher stimulation levels were not significantly different from  
418 those measured at the electrode locations with lower stimulation levels ( $t(22) = -0.53, p =$   
419  $.599$ ).

420 Insert Figure 5 about here

## 421 **Neural Synchrony and Speech Perception**

422 Figure 6 shows CNC word scores measured in quiet and in two noise conditions  
423 as a function of the PLV for 23 participants (26 ears). There was substantial variability in  
424 CNC word scores measured in quiet (range: 40.0 – 96.0%, mean: 73.1%, SD: 13.3%)

425 and in noise (+10 dB SNR: range: 22.0 – 84.0%, mean: 58.1%, SD: 15.8%; +5 dB SNR:  
426 range: 8.0 – 82.0%, mean: 45.6%, SD: 15.6%). There was no obvious relation between  
427 CNC word score and the PLV for each of the testing conditions. This observation was  
428 confirmed by the result of a Pearson product-moment correlation test with Bonferroni  
429 correction for multiple testing (Quiet:  $r = -0.18$ ,  $p = .193$ ; +10 dB SNR:  $r = -0.08$ ,  $p = .353$ ;  
430 +5 dB SNR:  $r = 0.15$ ,  $p = .238$ ).

431 Insert Figure 6 about here

432 A careful inspection of study results showed that the amount of change in CNC word  
433 scores with the presence of noise also varied among CI users (+10 dB SNR: range: -32  
434 – 4.0%, mean: -15.0%, SD: -9.5%; +5 dB SNR: range: -46.0 – -6.0%, mean: -27.4%, SD:  
435 -10.9%). For individual participants, the amount of change could not be predicted based  
436 on their scores measured in quiet. For example, the CNC scores measured in quiet in the  
437 right ear of participants A5 (A5R) and A19 (A19R) were 88% and 84%, respectively.  
438 While A19R showed a 44% decrease in CNC word score when a noise at +5 dB SNR  
439 was added, A5R only had a 6% decrease. Similarly, a CNC score of 72% measured in  
440 quiet was obtained for A3L and A15R. While A3L showed a 12% decrease in CNC word  
441 score, A15R had a 42% decrease when a noise at +5 dB SNR was added. Finally, both  
442 A7R and A17L showed a 32% decrease in CNC word scores when a noise at +5 dB SNR  
443 was added despite a 56% difference in CNC word scores measured in quiet between  
444 these two cases (scores measured in quiet: A7R: 96%, A17L: 40%). These observations  
445 were confirmed by the results of Pearson product-moment correlation tests with  
446 Bonferroni correction for multiple testing showing the nonsignificant correlation between  
447 CNC word score measured in quiet and the change in CNC word score when noise was

448 added (+10 dB SNR:  $r = -0.07$ ,  $p = .365$ ; +5 dB SNR:  $r = -0.18$ ,  $p = .192$ ). Due to these  
449 variations in the amount of change in CNC word scores with the presence of noise,  
450 participants with similar scores measured in quiet could show largely different scores  
451 measured in noise and *vice versa*. Overall, these results suggested individual variations  
452 in susceptibility to background noise among CI users, which could not be fully captured  
453 by their scores measured in noise.

454 To determine whether neural synchrony in the CN was a potential contributing factor  
455 to individual variations in noise susceptibility, we evaluated the relation between the PLV  
456 and the degree of noise effect on CNC word scores which was quantified as the amount  
457 of change in CNC word scores with the presence of noise. Figure 7 shows the change in  
458 CNC word scores plotted as a function of the PLV for both noise conditions. There was  
459 no obvious relation between the noise effect on CNC word score and the PLV for the +10  
460 dB SNR noise condition, which was confirmed by the result of a Pearson product-moment  
461 correlation test ( $r = -0.12$ ,  $p = .281$ ). The result of a Pearson product-moment correlation  
462 test with Bonferroni correction for multiple testing showed a moderate, negative  
463 correlation between the PLV and the degree of detrimental effect of background noise on  
464 CNC word score for the results measured at a SNR of +5 dB ( $r = -0.42$ ,  $p = .016$ ), with  
465 larger PLVs associated with smaller negative effects of background noise. This  
466 correlation is statistically significant after adjusting for multiple comparisons.

467 [Insert Figure 7 about here](#)

#### 468 **Periomodiolar vs. Lateral Wall Electrode Arrays**

469 In this study, 16 ears of 15 participants were implanted with a periomodiolar  
470 electrode array and all other testing ears were implanted with a lateral wall electrode

471 array. Even though it was not included in our original study design or the primary interest  
472 of this study, we conducted additional data analyses to determine whether the  
473 associations between the PLV, GDT and CNC word results differ between these two  
474 electrode arrays. Specifically, the effect of the PLV on GDT was evaluated using a LMM  
475 with the PLV, the stimulation level used to measure the PLV, the stimulation level used  
476 to measure GDT and electrode array type as fixed effects, participant as a random effect  
477 and an interaction between the PLV and electrode array type. The result showed a  
478 significant interaction ( $t_{(73)} = 2.55$ ,  $p = .013$ ), which suggests that the effect of the PLV on  
479 GDT differs between these two electrode arrays. The estimated slopes of linear  
480 regression functions modeling the relation between GDT and the PLV were significantly  
481 different from zero for both electrode arrays (lateral wall array: slope =  $-0.021$ ,  $p < .001$ ;  
482 periomodiolar array: slope =  $-0.006$ ,  $p = .018$ ). The difference in the estimated slopes  
483 between lateral wall and periomodiolar arrays was statistically significant ( $t_{(33.7)} = -2.55$ ,  $p$   
484 =  $.015$ ), which evidences a stronger effect of the PLV on GDT for lateral wall electrode  
485 array than for periomodiolar electrode array.

486 The relation between the PLV and CNC word results by electrode array type was  
487 evaluated using linear regression analyses. The outcome variable was the PLV with linear  
488 predictors of CNC word results and electrode array type, and the interaction between  
489 electrode array type and CNC scores/changes in CNC scores with noise. The interaction  
490 term included in the linear regression was used to determine if the relation between CNC  
491 results and the PLV differed by electrode array type. Evaluations were conducted with a  
492 total of five regression models with each model built for each CNC result. Overall, none  
493 of these models showed a significant interaction between electrode array type and CNC

494 results ( $p > .05$ ). Therefore, there is no sufficient evidence to suggest that the relation  
495 between the PLV and CNC word results differs by electrode array type.

## 496 **DISCUSSION**

497 This paper reports a newly developed method for quantifying neural synchrony in  
498 the electrically stimulated CN in human CI users. Using this newly developed method/tool,  
499 we evaluated the effects of peripheral neural synchrony on temporal resolution acuity and  
500 speech perception outcomes in human CI users. Results of this study showed variations  
501 in the degree of peripheral neural synchrony among CI users and demonstrated the  
502 important role that peripheral neural synchrony played in determining temporal resolution  
503 acuity in post-lingually deafened adult CI users. Our results also demonstrated a lack of  
504 association between the PLV and CNC word scores measured in quiet or in noise, as well  
505 as between the PLV and the amount of change in CNC word scores when a competing  
506 background noise at a SNR of +10 dB was added. However, there was a statistically  
507 significant negative correlation between the PLV and the degree of negative effect of  
508 background noise at a SNR of +5 dB. Overall, these results support our study hypothesis.

### 509 **Peripheral Neural Synchrony in Electrical Hearing**

510 PLVs measured in CI users in this study ranged from 0.09 to 0.76, which is much  
511 higher than those measured in listeners with acoustic hearing (Harris et al., 2021). These  
512 results are consistent with the literature in animal models showing lower temporal jitters  
513 (i.e., higher discharge synchronization) of neural responses evoked by electrical  
514 stimulation than those evoked by acoustic stimulation (e.g., van den Honert &  
515 Stypulkowski, 1984). As a result, morphological characteristics of the eCAP are different  
516 from those of the compound action potential evoked by acoustic stimulation, which lead

517 to the differences in frequency range, frame size and the number of linearly spaced  
518 frequencies used in Fast Fourier Transform analysis between this study and Harris et al.  
519 (2021). In addition, the recording window used in Harris et al. (2021) for PLV calculation  
520 is much longer than that used in this study (i.e., 10 ms vs 1561.6  $\mu$ s). As a result, the  
521 number of frames used in these two studies are also different. Another important  
522 difference is how the final, single PLV is defined. In Harris et al. (2021), it was defined as  
523 the peak PLV across a 2-ms window around the N1 peak of the CAP. In our study, it was  
524 defined as the averaged PLV across six partially overlapped frames to better capture the  
525 degree of synchrony in spikes with varied latencies. All these factors could contribute to  
526 the different PLV ranges observed in these two studies. Note that our use of the mean  
527 PLV is more similar to the approach use in an earlier study by Harris and colleagues, in  
528 which they calculated a single PLV value by taking the *median* value across time and  
529 frequency (Harris et al., 2018).

530         Results of previous histological and functional studies have shown unpredictable  
531 patterns of CN health within and among typical CI users with heterogeneous etiologies  
532 (e.g., DeVries et al., 2016; Nadol et al., 2012; Sagers et al., 2017; Schwartz-Leyzac &  
533 Pfungst, 2016). Therefore, variations in peripheral neural synchrony would be expected  
534 across CI users and across electrode locations within individual patients, which is  
535 consistent with the wide ranges of PLVs being measured at different electrode locations  
536 across the cochlea in this study. Neural structures at the apex tend to be healthier than  
537 those located at more basal region of the cochlea in typical listeners with sensorineural  
538 hearing loss (Zimmermann et al., 1995), which could contribute to the higher PLVs  
539 measured at more apical locations in this study.



## 540 **Peripheral Neural Synchrony and Auditory Perception Outcomes**

541 GDTs measured in this study are consistent with those reported in other studies that  
542 used similar testing paradigms and conditions (e.g., Busby & Clark, 1999; Garadat &  
543 Pfungst, 2011; Shader et al., 2020). Despite variations in GDTs and PLVs measured  
544 among participants, larger GDTs were observed at the electrode locations with smaller  
545 PLVs in all except for four implanted ears tested in this study. These data demonstrated  
546 that poor peripheral neural synchrony led to declined temporal resolution acuity in CI  
547 users, which is consistent with those measured in acoustic hearing (Michalewski et al.,  
548 2005; Zeng et al., 2005; Zeng et al., 1999). It should be noted that stimulation rate affects  
549 peripheral neural synchrony in electrical hearing, with higher stimulation rates resulting in  
550 lower/worse neural synchrony (Rubinstein et al., 1999). As a result, the degree of  
551 peripheral neural synchrony induced by the pulse train stimulation used to measure GDT  
552 is expected to be much lower than that quantified by the PLV in this study. Nevertheless,  
553 the results of both measures are affected by dyssynchronous neural firing, which explains  
554 to the strong relation between these two measures.

555 Our results showed a lack of correlation between peripheral neural synchrony and  
556 CNC word scores. These results are not consistent with the significant correlation  
557 between peripheral neural synchrony and CNC word scores measured in quiet reported  
558 by Dong et al. (2023). However, it should be noted that peripheral neural synchrony was  
559 not directly assessed in the experimental design of Dong et al. (2023). Instead, it was  
560 estimated using computational modeling techniques by deconvolving intraoperative  
561 recordings of the eCAP with an estimated human unitary response to obtain the  
562 distribution of firing latencies summed across CN fibers. As acknowledged by the authors,

563 the estimation of neural synchrony using this modeling approach is highly dependent on  
564 the shape of the assumed unitary response from CN fibers, which has not been  
565 assessed/validated directly in humans (Dong et al., 2020; Dong et al., 2023). It is possible  
566 that degeneration of CN fibers leads to changes in the effective unitary response functions  
567 for each fiber, such that their simulated results did not fully reflect the actual peripheral  
568 neural synchrony in CI users. This methodological difference could contribute to the  
569 discrepancy between the results of Dong et al. (2023) and the present study. Speech  
570 perception outcomes in noise were not evaluated by Dong et al. (2023).

571 One finding of this study is the moderate correlation between the PLV and the  
572 detrimental effect of background noise on speech perception outcomes measured for the  
573 +5 dB SNR noise condition. This finding suggested that the degree of neural synchrony,  
574 as quantified using the PLV, accounted for approximately 18% of the negative effect of  
575 competing background noise presented at a SNR of +5 dB on CNC word scores. This  
576 statistically significant result could also be clinically meaningful given the fact that  
577 combining multiple factors could only explain less than 40% of variance in speech  
578 perception outcomes in CI users (Blamey et al., 1996; Blamey et al., 2013; Holden et al.,  
579 2013; James et al., 2019; Lazard et al., 2012). This association was not observed for  
580 speech perception outcomes measured at +10 dB SNR. Overall, these results indicated  
581 that peripheral neural synchrony could be an important factor determining the degree of  
582 the noise effect on speech perception outcomes in CI users in the case of mixed speech  
583 and masker signals presented to the same ear. The importance of peripheral neural  
584 synchrony to speech perception seems to increase with elevated background noise,  
585 which is consistent with our previous results showing a stronger impact of CN function on

586 speech perception outcomes in more challenging listening conditions (Skidmore et al.,  
587 2023b).

## 588 **Methodological Considerations**

589 There are several methodological factors that need to be considered when applying  
590 this method in future studies. First, using different parameters in mathematical calculation  
591 will result in different PLV results. To determine whether this is a crucial factor for this  
592 newly developed method, we used three additional sets of parameters to calculate the  
593 PLV and assessed their associations with GDTs, CNC word scores measured in different  
594 conditions and the noise effect on CNC word scores using the same statistical analysis  
595 methods as those reported in this study. Overall, PLVs calculated using all four sets of  
596 parameters are strongly correlated with each other (Pearson correlation coefficients:  
597 0.94-0.98,  $p < .001$ ). More importantly, the results calculated using different sets of  
598 parameters are consistent and lead to the same conclusions. These three additional sets  
599 of parameters used to calculate the PLV are reported in Table A1 included in  
600 Supplemental Digital Content 1. GDTs plotted as a function for PLVs calculated using  
601 these additional parameters are shown in Figure A1 included in Supplemental Digital  
602 Content 2. The association between PLVs and CNC word scores measured in different  
603 conditions and the association between the PLV and the noise effect on CNC word scores  
604 are shown in Figures B1 and C1 included in supplemental Digital Content 3 and 4,  
605 respectively. The results of Pearson-Moment Product correlation tests are also shown in  
606 these two figures. Descriptive results of PLVs calculated using these three additional sets  
607 of parameters and LMMs results showing the effect of stimulation level and electrode  
608 location on the PLV are reported in Table B1 included in Supplemental Digital Content 5.

609 Results of pairwise comparisons for comparing PLVs measured at different electrode  
610 locations are reported in Table C1 included in Supplemental Digital Content 6. Overall,  
611 these data suggest that this method does not rely on the specific parameters used in the  
612 time-frequency decomposition.

613 Second, the recording window for measuring the eCAP should not be confused with  
614 the frame size in time used in the time-frequency decomposition. The recording window  
615 offered by different CI manufacturers' software ranges from 1561.6-2500  $\mu$ s, which is  
616 longer than a time window where the eCAP is expected for in human CI users (i.e., within  
617 the first 1200  $\mu$ s) (Botros et al., 2007). The inter-trial phase coherence is low for the part  
618 where the recorded traces only contain noise. As a result, including prolonged time  
619 window in the time-frequency decomposition is not always beneficial or appropriate.  
620 Admittedly, the duration of the recording window affects the number of frames that could  
621 be included in the time-frequency decomposition. However, our results reported in  
622 Supplemental Digital Contents suggest that it is not a determining factor for this method.

623 Third, Advanced Bionics and MedEL devices offer higher sampling rates  
624 (Advanced Bionics: 56 kHz, MedEL: 1.2 MHz) than Cochlear™ Nucleus® device for  
625 eCAP recording. This parameter is determined by each CI manufacturer and cannot be  
626 changed in their clinical software. In human CI users, the shortest possible interpeak  
627 latency of the eCAP is around 0.2 ms (for a review, see He et al., 2017). In a Fast Fourier  
628 Transform analysis, this corresponds to a fundamental period of 0.4 ms or a fundamental  
629 frequency of 2.5 kHz. Cochlear™ Nucleus® device offers a sampling rate of 20,492 Hz,  
630 and therefore the fundamental frequency and first few harmonics of these shortest eCAP  
631 waveforms fall below the Nyquist frequency of 10,246 Hz. Thus, this sampling rate, which

632 is the lowest among all three major CI devices, is sufficient for eCAP recording and is not  
633 a factor that could limit the sensitivity of PLV measures. Nevertheless, the difference in  
634 sampling rate affects two parameters used in the time-frequency decomposition: the  
635 number of frames that can be included in the time-frequency decomposition and the  
636 number of samples that can be included in each frame. Higher sampling rates allow for  
637 shorter onset-to-onset intervals between two adjacent frames and more samples included  
638 in each frame. As a result, more frames with more samples included per frame can be  
639 included to calculate the PLV for Advanced Bionics and MedEL devices than for  
640 Cochlear™ Nucleus® device, which will affect the resulting PLV. This issue would not be  
641 problematic when comparing PLVs measured using the device from the same  
642 manufacturer. Only including the PLVs calculated for the frames with similar central  
643 spectral time windows to calculate the averaged PLV could eliminate the cross-device  
644 difference in the number of frames used in PLV calculation. One potential solution to  
645 minimize the effect of hardware-related difference on study results when comparing PLVs  
646 across devices is to normalize PLVs measured in individual participants based on the  
647 PLV range measured in a large group of patients with the same device, and to use the  
648 normalized results in comparison. This topic requires additional studies and is beyond the  
649 scope of this work.

650 Fourth, parameter modifications might be needed when applying this method to  
651 some patient populations whose morphological characteristics of the eCAP differ from  
652 those recorded in “typical” CI users. For example, eCAPs recorded in children with  
653 cochlear nerve deficiency show prolonged interpeak latencies and less prominent P2  
654 peak, which could affect the frequency range used in the time-frequency decomposition.

655 Finally, results of previously published studies showed that the variation in  
656 discharge synchronization increases with pulse phase duration (Bruce et al., 1999) and  
657 during refractory recovery (Miller et al., 2001). The potential difference in spike initiation  
658 site for cathodic vs anodic stimulation also affects temporal jitter (Javel & Shepherd,  
659 2000). As a result, the PLV could be affected by characteristics of the electrical pulse and  
660 the artifact rejection technique used to measured eCAP traces.

### 661 **Potential Study Limitations**

662 This study has five potential limitations. First, this method is developed based on  
663 morphological characteristics of the eCAP measured in human CI users. Parameters  
664 used in this method may need to be modified to suit different animal models due to the  
665 anatomical difference in the CN between animal models and human listeners and the  
666 difference in durations and etiologies of deafness between experimental animals and  
667 human CI users. Second, the stimulation level could be a confounding factor for the  
668 results of this study because results of previous studies suggested a CN-health-  
669 dependent effect of stimulation level on peripheral neural synchrony. Specifically, Harris  
670 et al. (2021) reported larger PLVs measured at higher stimulation levels in listeners with  
671 acoustic hearing. However, this association was only observed in listeners with good CN  
672 health (i.e., young hearing listeners) and not in elderly listeners who have been shown to  
673 have poor peripheral neural synchrony and reduced CN densities. These results  
674 suggested that the stimulation level could be a confounding factor for the results of this  
675 study and thereby needs to be controlled for. Using stimulation levels that are balanced  
676 based on subjective perception of loudness has been widely used to control/minimize the  
677 potential stimulation level effect in psychophysical studies. In this study, both single-pulse

678 and pulse-train stimuli delivered to different CI electrodes tested in each participant were  
679 presented at the levels that were determined to be “maximal comfort” (rating 8 on the  
680 same visual loudness rating scale). Therefore, in a certain sense and to a certain degree,  
681 the stimulation levels used at different electrodes can be considered loudness balanced  
682 within each participant and even across participants. However, electrical biphasic pulses  
683 that evoke neural responses with comparable amplitudes or these matched in current  
684 level are not necessarily perceived as equally loud by CI users (Kirby et al., 2012).  
685 Similarly, neural responses evoked by pulses that are perceived equally loud by CI users  
686 can have a large difference in neural response amplitude (Kirby et al., 2012). In addition,  
687 comparing loudness for single pulse stimulation with a total duration of only 57  $\mu$ s could  
688 be impossible for many CI users, as demonstrated during our pilot study. Therefore, using  
689 loudness-balanced stimulation levels may not be a good solution to eliminate the potential  
690 level effect on study results. Instead, the stimulation level effect on results of this study  
691 was controlled using statistical analyses. Third, as an initial step toward understanding  
692 the role of peripheral neural synchrony in determining CI clinical outcomes, this study only  
693 evaluated the association between neural synchrony in the CN and monoaural auditory  
694 perception outcomes in human CI users. The modeling study by Resnick and Rubinstein  
695 (2021) suggests that degraded neural synchrony might have an even greater impact in  
696 binaural listening conditions where interaural timing difference cues are needed to help  
697 separate a speech stream from background noise. Further studies are warranted to  
698 determine the role of neural synchrony in the CN in binaural hearing. Fourth, despite  
699 these results, the exact biological underpinning (e.g., demyelination, peripheral axon  
700 degeneration, or total SGN loss) of the PLV remains unknown and requires further

701 investigation. Due to the lack of noninvasive tools, it is not feasible to use experimental  
702 approaches to determine physiological conditions of the CN in living human listeners.  
703 Computational modeling techniques have been widely used to probe neuroanatomical  
704 conditions underlying neural response patterns in neuroscience, which holds the potential  
705 to be used to answer this important question. Finally, participants tested in this study  
706 generally showed better/higher CNC word scores than those previously reported (e.g.,  
707 Bierer et al., 2016; Holder et al., 2020). Further studies in CI users with varied speech  
708 perception outcomes are warranted to fully assess the role of peripheral neural synchrony  
709 in determining auditory perception outcomes in electrical hearing.

## 710 **CONCLUSIONS**

711 Neural synchrony in the electrically stimulated CN could be estimated at individual  
712 electrode locations in CI users by calculating the phase coherence across repeated  
713 presentations of a single pulse stimulus using the method reported in this paper.  
714 Peripheral neural synchrony varies across CI users and electrode locations. Poorer  
715 peripheral neural synchrony leads to lower temporal resolution acuity. The degree of  
716 peripheral neural synchrony is associated with the size of detrimental effect of competing  
717 background noise on speech perception performance in post-lingually deafened adult CI  
718 users. Further studies are warranted to fully understand the role of peripheral neural  
719 synchrony in determining auditory perception outcomes in electrical hearing.

720



721 **REFERENCES**

- 722 Bierer, J.A., Spindler, E., Bierer, S.M., & Wright, R. (2016). An examination of sources of  
723 variability across the Consonant-Nucleus-Consonant test in cochlear implant  
724 listeners. *Trends in Hearing*, 20, 2331216516646556.  
725 <https://doi.org/10.1177/2331216516646556>
- 726 Blamey, P., Arndt, P., Bergeron, F., Bredberg, G., Brimacombe, J., Facer, G., Larky, J.,  
727 Lindström, B., Nedzelski, J., Peterson, A., Shipp, D., Staller, S., & Whitford, L.  
728 (1996). Factors affecting auditory performance of postlinguistically deaf adults  
729 using cochlear implants. *Audiology and Neuro-Otology*, 1(5), 293-306.  
730 <https://doi.org/10.1159/000259212>
- 731 Blamey, P., Artieres, F., Baskent, D., Bergeron, F., Beynon, A., Burke, E., Dillier, N.,  
732 Dowell, R., Fraysse, B., Gallego, S., Govaerts, P. J., Green, K., Huber, A. M.,  
733 Kleine-Punte, A., Maat, B., Marx, M., Mawman, D., Mosnier, I., O'Connor, A. F., .  
734 . . Lazard, D. S. (2013). Factors affecting auditory performance of postlinguistically  
735 deaf adults using cochlear implants: An update with 2251 patients. *Audiology and*  
736 *Neuro-Otology*, 18(1), 36-47. <https://doi.org/10.1159/000343189>
- 737 Botros, A., van Dijk, B., & Killian, M. (2007). Autonrt: An automated system that measures  
738 ecap thresholds with the nucleus freedom cochlear implant via machine  
739 intelligence. *Artificial Intelligence in Medicine*, 40(1), 15-28.  
740 <https://doi.org/10.1016/j.artmed.2006.06.003>
- 741 Brown, C. J., Abbas, P. J., & Gantz, B. (1990). Electrically evoked whole-nerve action  
742 potentials: Data from human cochlear implant users. *The Journal of the Acoustical*  
743 *Society of America*, 88(3), 1385-1391. <https://doi.org/10.1121/1.399716>

- 744 Bruce, I. C., Léger, A. C., Moore, B. C., & Lorenzi, C. (2013). Physiological prediction of  
745 masking release for normal-hearing and hearing-impaired listeners. *Proceedings*  
746 *of Meetings on Acoustics*, 19(1). <https://doi.org/10.1121/1.4799733>
- 747 Bruce, I.C., White, M.W., Irlicht, L.S., O'Leary, S.J., Dynes, S., Javel, E., & Clark, G.M.  
748 (1999). A stochastic model of the electrically stimulated auditory nerve: single-  
749 pulse response. *IEEE Transactions on Biomedical Engineering*, 46(6), 617-629.  
750 [https://doi: 10.1109/10.764938](https://doi.org/10.1109/10.764938)
- 751 Busby, P. A., & Clark, G. M. (1999). Gap detection by early-deafened cochlear-implant  
752 subjects. *Journal of the Acoustical Society of America*, 105(3), 1841-1852.  
753 [https://doi.org/Doi 10.1121/1.426721](https://doi.org/10.1121/1.426721)
- 754 Clay, K. M. S., & Brown, C. J. (2007). Adaptation of the electrically evoked compound  
755 action potential (ecap) recorded from nucleus ci24 cochlear implant users. *Ear and*  
756 *Hearing*, 28(6), 850-861. <https://doi.org/10.1097/aud.0b013e318157671f>
- 757 Delgutte, B., & Kiang, N. Y. (1984). Speech coding in the auditory nerve: I. Vowel-like  
758 sounds. *Journal of the Acoustical Society of America*, 75(3), 866-878.  
759 <https://doi.org/10.1121/1.390596>
- 760 Delorme, A., & Makeig, S. (2004). Eeglab: An open source toolbox for analysis of single-  
761 trial eeg dynamics including independent component analysis. *Journal of*  
762 *Neuroscience Methods*, 134(1), 9-21.  
763 <https://doi.org/10.1016/j.jneumeth.2003.10.009>
- 764 DeVries, L., Scheperle, R., & Bierer, J. A. (2016). Assessing the electrode-neuron  
765 interface with the electrically evoked compound action potential, electrode

- 766 position, and behavioral thresholds. *Journal of the Association for Research in*  
767 *Otolaryngology*, 17(3), 237-252. <https://doi.org/10.1007/s10162-016-0557-9>
- 768 Di Stadio, A., Volpe, A. D., Ralli, M., Korsch, F., Greco, A., & Ricci, G. (2020). Spiral  
769 ganglions and speech perception in the elderly. Which turn of the cochlea is the  
770 more relevant? A preliminary study on human temporal bones. *The Journal of*  
771 *International Advanced Otology*, 16(3), 318-322.  
772 <https://doi.org/10.5152/iao.2020.8481>
- 773 Dong, Y., Briaire, J. J., Biesheuvel, J. D., Stronks, H. C., & Frijns, J. H. M. (2020).  
774 Unravelling the temporal properties of human ecaps through an iterative  
775 deconvolution model. *Hearing Research*, 395, 108037.  
776 <https://doi.org/10.1016/j.heares.2020.108037>
- 777 Dong, Y., Briaire, J. J., Stronks, H. C., & Frijns, J. H. M. (2023). Speech perception  
778 performance in cochlear implant recipients correlates to the number and synchrony  
779 of excited auditory nerve fibers derived from electrically evoked compound action  
780 potentials. *Ear and Hearing*, 44(2), 276-286.  
781 <https://doi.org/10.1097/Aud.0000000000001279>
- 782 Eisenberg, L. S., Fisher, L. M., Johnson, K. C., Ganguly, D. H., Grace, T., Niparko, J. K.,  
783 & Team, C. D. I. (2016). Sentence recognition in quiet and noise by pediatric  
784 cochlear implant users: Relationships to spoken language. *Otology & Neurotology*,  
785 37(2), e75-81. <https://doi.org/10.1097/MAO.0000000000000910>
- 786 El-Badry, M. M., Ding, D.-L., McFadden, S. L., & Eddins, A. C. (2007). Physiological  
787 effects of auditory nerve myelinopathy in chinchillas. *European Journal of*

- 788 *Neuroscience*, 25(5), 1437-1446. <https://doi.org/10.1111/j.1460->  
789 9568.2007.05401.x
- 790 Fayad, J., Linthicum, F. H., Jr., Otto, S. R., Galey, F. R., & House, W. F. (1991). Cochlear  
791 implants: Histopathologic findings related to performance in 16 human temporal  
792 bones. *Annals of Otology, Rhinology and Laryngology*, 100(10), 807-811.  
793 <https://doi.org/10.1177/000348949110001004>
- 794 Fayad, J. N., & Linthicum, F. H., Jr. (2006). Multichannel cochlear implants: Relation of  
795 histopathology to performance. *Laryngoscope*, 116(8), 1310-1320.  
796 <https://doi.org/10.1097/01.mlg.0000227176.09500.28>
- 797 Garadat, S. N., & Pfingst, B. E. (2011). Relationship between gap detection thresholds  
798 and loudness in cochlear-implant users. *Hearing Research*, 275(1-2), 130-138.  
799 <https://doi.org/10.1016/j.heares.2010.12.011>
- 800 Gonzalez-Gonzalez, S., & Cazevieuille, C. (2019). Myelination of the auditory nerve:  
801 Functions and pathology. *Scientific Journal of Research & Reviews*, 1(3).  
802 <https://doi.org/10.33552/sjrr.2019.01.000513>
- 803 Harris, K. C., Ahlstrom, J. B., Dias, J. W., Kerouac, L. B., McClaskey, C. M., Dubno, J.  
804 R., & Eckert, M. A. (2021). Neural presbycusis in humans inferred from age-  
805 related differences in auditory nerve function and structure. *Journal of*  
806 *Neuroscience*, 41(50), 10293-10304. <https://doi.org/10.1523/JNEUROSCI.1747->  
807 21.2021
- 808 Harris, K.C., Vaden Jr., K.I., McClaskey, C.M., Dias, J.W., & Dubno, J.R. (2018).  
809 Complementary metrics of human auditory nerve function derived from compound

- 810 action potentials. *Journal of Neurophysiology*, 119(3), 1019-1028. [https://doi:](https://doi.org/10.1152/jn.00638.2017)  
811 10.1152/jn.00638.2017
- 812 Hartmann, R., Topp, G., & Klinke, R. (1984). Discharge patterns of cat primary auditory  
813 fibers with electrical stimulation of the cochlea. *Hearing Research*, 13(1), 47-62.  
814 [https://doi.org/10.1016/0378-5955\(84\)90094-7](https://doi.org/10.1016/0378-5955(84)90094-7)
- 815 He, S., Skidmore, J., Koch, B., Chatterjee, M., Carter, B. L., & Yuan, Y. (2023).  
816 Relationships between the auditory nerve sensitivity to amplitude modulation,  
817 perceptual amplitude modulation rate discrimination sensitivity, and speech  
818 perception performance in postlingually deafened adult cochlear implant users.  
819 *Ear and Hearing*, 44(2), 371-384. <https://doi.org/10.1097/Aud.0000000000001289>
- 820 He, S., Teagle, H.F.B., & Buchman, C.A. (2017). The electrically evoked compound action  
821 potential: From laboratory to clinic. *Frontiers in Neuroscience*, 11, 339. [https://doi:](https://doi.org/10.3389/fnins.2017.00339)  
822 10.3389/fnins.2017.00339
- 823 Heeringa, A. N., & Koppl, C. (2022). Auditory nerve fiber discrimination and  
824 representation of naturally-spoken vowels in noise. *eNeuro*, 9(1).  
825 <https://doi.org/10.1523/ENEURO.0474-21.2021>
- 826 Heshmat, A., Sajedi, S., Johnson Chacko, L., Fischer, N., Schrott-Fischer, A., & Rattay,  
827 F. (2020). Dendritic degeneration of human auditory nerve fibers and its impact on  
828 the spiking pattern under regular conditions and during cochlear implant  
829 stimulation. *Frontiers in Neuroscience*, 14, 599868.  
830 <https://doi.org/10.3389/fnins.2020.599868>
- 831 Holder, J.T., Dwyer, N.C., & Gifford, R.H. (2020). Duration of processor user per day is  
832 significantly correlated with speech recognition abilities in adults with cochlear

- 833 implants. *Otology & Neurotology*, 41(2), e227-e231. [https://doi.org/](https://doi.org/10.1097/MAO.0000000000002477)  
834 10.1097/MAO.0000000000002477
- 835 Holden, L. K., Finley, C. C., Firszt, J. B., Holden, T. A., Brenner, C., Potts, L. G., Gotter,  
836 B. D., Vanderhoof, S. S., Mispagel, K., Heydebrand, G., & Skinner, M. W. (2013).  
837 Factors affecting open-set word recognition in adults with cochlear implants. *Ear*  
838 *and Hearing*, 34(3), 342-360. <https://doi.org/10.1097/aud.0b013e3182741aa7>
- 839 James, C. J., Karoui, C., Laborde, M. L., Lepage, B., Molinier, C. E., Tartayre, M., Escude,  
840 B., Deguine, O., Marx, M., & Fraysse, B. (2019). Early sentence recognition in adult  
841 cochlear implant users. *Ear and Hearing*, 40(4), 905-917.  
842 <https://doi.org/10.1097/AUD.0000000000000670>
- 843 Javel, E., & Shepherd, R. K. (2000). Electrical stimulation of the auditory nerve. Iii.  
844 Response initiation sites and temporal fine structure. *Hearing Research*, 140(1-2),  
845 45-76. [https://doi.org/10.1016/s0378-5955\(99\)00186-0](https://doi.org/10.1016/s0378-5955(99)00186-0)
- 846 Kandel, E. R. (2002). Disease of the motor unit. . In E. R. Kandel, J. H. Schwartz, & T. M.  
847 Jessell (Eds.), *Principles of neural science* (4th ed., pp. 695-703). McGraw-Hill,  
848 Health Professions Division.
- 849 Kim, J. H., Renden, R., & von Gersdorff, H. (2013). Dysmyelination of auditory afferent  
850 axons increases the jitter of action potential timing during high-frequency firing.  
851 *Journal of Neuroscience*, 33(22), 9402-9407.  
852 <https://doi.org/10.1523/Jneurosci.3389-12.2013>
- 853 Kirby, B., Brown, C., Abbas, P., Etler, C., & O'Brien, S. (2012). Relationships between  
854 electrically evoked potentials and loudness growth in bilateral cochlear implant

855 users. *Ear and Hearing*, 33(3), 389-398.  
856 <https://doi.org/10.1097/aud.0b013e318239adb8>

857 Kraus, N., Bradlow, A. R., Cheatham, M. A., Cunningham, J., King, C. D., Koch, D. B.,  
858 Nicol, T. G., McGee, T. J., Stein, L. K., & Wright, B. A. (2000). Consequences of  
859 neural asynchrony: A case of auditory neuropathy. *Journal of the Association for*  
860 *Research in Otolaryngology*, 1(1), 33-45. <https://doi.org/10.1007/s101620010004>

861 Kumar, P., Sharma, S., Kaur, C., Pal, I., Bhardwaj, D. N., Vanamail, P., Roy, T. S., &  
862 Jacob, T. G. (2022). The ultrastructural study of human cochlear nerve at different  
863 ages. *Hearing Research*, 416, 108443.  
864 <https://doi.org/10.1016/j.heares.2022.108443>

865 Kusunoki, T., Cureoglu, S., Schachern, P. A., Baba, K., Kariya, S., & Paparella, M. M.  
866 (2004). Age-related histopathologic changes in the human cochlea: A temporal  
867 bone study. *Otolaryngology and Head and Neck Surgery*, 131(6), 897-903.  
868 <https://doi.org/10.1016/j.otohns.2004.05.022>

869 Lazard, D. S., Vincent, C., Venail, F., Van de Heyning, P., Truy, E., Sterkers, O.,  
870 Skarzynski, P. H., Skarzynski, H., Schauwers, K., O'Leary, S., Mawman, D., Maat,  
871 B., Kleine-Punte, A., Huber, A. M., Green, K., Govaerts, P. J., Fraysse, B., Dowell,  
872 R., Dillier, N., . . . Blamey, P. J. (2012). Pre-, per- and postoperative factors  
873 affecting performance of postlinguistically deaf adults using cochlear implants: A  
874 new conceptual model over time. *PloS One*, 7(11), e48739.  
875 <https://doi.org/10.1371/journal.pone.0048739>

876 Lenth, R. (2023). emmeans: Estimated Marginal Means, aka Least-Squares Means. R  
877 package version 1.8.6. <https://CRAN.R-project.org/package=emmeans>.

- 878 Levitt, H. (1971). Transformed up-down methods in psychoacoustics. *Journal of the*  
879 *Acoustical Society of America*, 49(2), 467-&. [https://doi.org/Doi](https://doi.org/10.1121/1.1912375)  
880 10.1121/1.1912375
- 881 Linthicum, F. H., Jr., & Fayad, J. N. (2009). Spiral ganglion cell loss is unrelated to  
882 segmental cochlear sensory system degeneration in humans. *Otology &*  
883 *Neurotology*, 30(3), 418-422. <https://doi.org/10.1097/mao.0b013e31819a8827>
- 884 Makary, C. A., Shin, J., Kujawa, S. G., Liberman, M. C., & Merchant, S. N. (2011). Age-  
885 related primary cochlear neuronal degeneration in human temporal bones. *Journal*  
886 *of the Association for Research in Otolaryngology*, 12(6), 711-717.  
887 <https://doi.org/10.1007/s10162-011-0283-2>
- 888 Merchant, S. N., Adams, J. C., & Nadol, J. B., Jr. (2005). Pathology and pathophysiology  
889 of idiopathic sudden sensorineural hearing loss. *Otology & Neurotology*, 26(2),  
890 151-160. <https://doi.org/10.1097/00129492-200503000-00004>
- 891 Michalewski, H. J., Starr, A., Nguyen, T. T., Kong, Y. Y., & Zeng, F. G. (2005). Auditory  
892 temporal processes in normal-hearing individuals and in patients with auditory  
893 neuropathy. *Clinical Neurophysiology*, 116(3), 669-680.  
894 <https://doi.org/10.1016/j.clinph.2004.09.027>
- 895 Miller, C.A., Abbas, P.J., & Robinson, B.K. (2001). Response properties of the refractory  
896 auditory nerve fiber. *Journal of the Association for Research in Otolaryngology*,  
897 2(3), 216-232. [https://doi: 10.1007/s101620010083](https://doi.org/10.1007/s101620010083)
- 898 Nadol, J. B., Adams, J. C., & O'Malley, J. T. (2012). Temporal bone histopathology in a  
899 case of sensorineural hearing loss caused by superficial siderosis of the central



- 900 nervous system and treated by cochlear implantation. *Otology & Neurotology*,  
901 32(5), 748-755. <https://doi.org/10.1097/mao.0b013e31820e7195>
- 902 Nadol, J. B., Jr. (1990). Degeneration of cochlear neurons as seen in the spiral ganglion  
903 of man. *Hearing Research*, 49(1-3), 141-154. [https://doi.org/10.1016/0378-5955\(90\)90101-t](https://doi.org/10.1016/0378-5955(90)90101-t)
- 904
- 905 Nadol, J. B., Jr. (1997). Patterns of neural degeneration in the human cochlea and  
906 auditory nerve: Implications for cochlear implantation. *Otolaryngology and Head  
907 and Neck Surgery*, 117(3 Pt 1), 220-228. [https://doi.org/10.1016/s0194-5998\(97\)70178-5](https://doi.org/10.1016/s0194-5998(97)70178-5)
- 908
- 909 Nadol, J. B., Jr., Young, Y. S., & Glynn, R. J. (1989). Survival of spiral ganglion cells in  
910 profound sensorineural hearing loss: Implications for cochlear implantation. *Annals  
911 of Otology, Rhinology and Laryngology*, 98(6), 411-416.  
912 <https://doi.org/10.1177/000348948909800602>
- 913 Parkins, C. W. (1989). Temporal response patterns of auditory nerve fibers to electrical  
914 stimulation in deafened squirrel monkeys. *Hearing Research*, 41(2-3), 137-168.  
915 [https://doi.org/10.1016/0378-5955\(89\)90007-5](https://doi.org/10.1016/0378-5955(89)90007-5)
- 916 Pinheiro, J., Bates, D., & R Core Team (2023). nlme: Linear and Nonlinear Mixed Effects  
917 Models. R package version 3.1-162, <https://CRAN.R-project.org/package=nlme>.
- 918 Rance, G. (2005). Auditory neuropathy/dys-synchrony and its perceptual consequences.  
919 *Trends in Amplification*, 9(1), 1-43. <https://doi.org/10.1177/108471380500900102>
- 920 Rask-Andersen, H., Liu, W., & Linthicum, F. (2010). Ganglion cell and 'dendrite'  
921 populations in electric acoustic stimulation ears. *Advances in Oto-Rhino-  
922 Laryngology*, 67, 14-27. <https://doi.org/10.1159/000262593>

- 923 Resnick, J. M., & Rubinstein, J. T. (2021). Simulated auditory fiber myelination  
924 heterogeneity desynchronizes population responses to electrical stimulation  
925 limiting inter-aural timing difference representation. *Journal of the Acoustical*  
926 *Society of America*, 149(2), 934-947. <https://doi.org/10.1121/10.0003387>
- 927 Rubinstein, J.T., Wilson, B.S., Finley, C.C., & Abbas, P.J. (1999). Pseudospontaneous  
928 activity: stochastic independence of auditory nerve fibers with electrical  
929 stimulation. *Hearing Research*, 127(1-2), 108-118.
- 930 Sachs, M. B., Voigt, H. F., & Young, E. D. (1983). Auditory nerve representation of vowels  
931 in background noise. *Journal of Neurophysiology*, 50(1), 27-45.  
932 <https://doi.org/10.1152/jn.1983.50.1.27>
- 933 Sagers, J. E., Landegger, L. D., Worthington, S., Nadol, J. B., & Stankovic, K. M. (2017).  
934 Human cochlear histopathology reflects clinical signatures of primary neural  
935 degeneration. *Scientific Reports*, 7. <https://doi.org/10.1038/s41598-017-04899-9>
- 936 Schwartz-Leyzac, K. C., & Pfungst, B. E. (2016). Across-site patterns of electrically evoked  
937 compound action potential amplitude-growth functions in multichannel cochlear  
938 implant recipients and the effects of the interphase gap. *Hearing Research*, 341,  
939 50-65. <https://doi.org/10.1016/j.heares.2016.08.002>
- 940 Shader, M. J., Gordon-Salant, S., & Goupell, M. J. (2020). Impact of aging and the  
941 electrode-to-neural interface on temporal processing ability in cochlear-implant  
942 users: Gap detection thresholds. *Trends in Hearing*, 24, 233121652095656.  
943 <https://doi.org/10.1177/2331216520956560>

- 944 Shepherd, R. K., & Hardie, N. A. (2001). Deafness-induced changes in the auditory  
945 pathway: Implications for cochlear implants. *Audiology and Neuro-Otology*, 6(6),  
946 305-318. <https://doi.org/10.1159/000046843>
- 947 Shepherd, R. K., & Javel, E. (1997). Electrical stimulation of the auditory nerve. I.  
948 Correlation of physiological responses with cochlear status. *Hearing Research*,  
949 108(1-2), 112-144. [https://doi.org/10.1016/s0378-5955\(97\)00046-4](https://doi.org/10.1016/s0378-5955(97)00046-4)
- 950 Skidmore, J., Bruce, I. C., Yuan, Y., & He, S. (2023a). *Quantifying neural synchrony at*  
951 *the level of the auditory nerve in cochlear implant users with recordings of the*  
952 *electrically evoked compound action potential [poster sa34]* [Poster]. Association  
953 for Research in Otolaryngology (ARO) 46th MidWinter Meeting, Orlando, Florida.
- 954 Skidmore, J., Oleson, J. J., Yuan, Y., & He, S. (2023b). The relationship between cochlear  
955 implant speech perception outcomes and electrophysiological measures of the  
956 electrically evoked compound action potential. *Ear and Hearing*, 44(6), 1485-1497.  
957 <https://doi.org/10.1097/AUD.0000000000001389>
- 958 Skidmore, J., Ramekers, D., Bruce, I. C., & He, S. (2022). Comparison of response  
959 properties of the electrically stimulated auditory nerve reported in human listeners  
960 and in animal models. *Hearing Research*, 426, 108643.  
961 <https://doi.org/10.1016/j.heares.2022.108643>
- 962 Sly, D. J., Heffer, L. F., White, M. W., Shepherd, R. K., Birch, M. G. J., Minter, R. L.,  
963 Nelson, N. E., Wise, A. K., & O'Leary, S. J. (2007). Deafness alters auditory nerve  
964 fibre responses to cochlear implant stimulation. *European Journal of*  
965 *Neuroscience*, 26(2), 510-522. <https://doi.org/10.1111/j.1460-9568.2007.05678.x>

- 966 Starr, A., Michalewski, H. J., Zeng, F. G., Fujikawa-Brooks, S., Linthicum, F., Kim, C. S.,  
967 Winnier, D., & Keats, B. (2003). Pathology and physiology of auditory neuropathy  
968 with a novel mutation in the mpz gene (tyr145 -> ser). *Brain*, 126, 1604-1619.  
969 <https://doi.org/10.1093/brain/awg156>
- 970 Suzuka, Y., & Schuknecht, H. F. (1988). Retrograde cochlear neuronal degeneration in  
971 human subjects. *Acta Oto-Laryngologica Supplementum*, 450, 1-20.  
972 <https://doi.org/10.3109/00016488809098973>
- 973 Tasaki, I. (1955). New measurements of the capacity and the resistance of the myelin  
974 sheath and the nodal membrane of the isolated frog nerve fiber. *American Journal*  
975 *of Physiology*, 181(3), 639-650. <https://doi.org/10.1152/ajplegacy.1955.181.3.639>
- 976 Torkildsen, J. V. K., Hitchins, A., Myhrum, M., & Wie, O. B. (2019). Speech-in-noise  
977 perception in children with cochlear implants, hearing aids, developmental  
978 language disorder and typical development: The effects of linguistic and cognitive  
979 abilities. *Frontiers in Psychology*, 10, 2530.  
980 <https://doi.org/10.3389/fpsyg.2019.02530>
- 981 Ungar, O. J., Handzel, O., & Santos, F. (2018). Rate of spiral ganglion cell loss in  
982 idiopathic sudden sensorineural hearing loss. *Otology & Neurotology*, 39(10),  
983 e944-e949. <https://doi.org/10.1097/MAO.0000000000001992>
- 984 van den Honert, C., & Stypulkowski, P. H. (1984). Physiological properties of the  
985 electrically stimulated auditory nerve. II. Single fiber recordings. *Hearing Research*,  
986 14(3), 225-243. [https://doi.org/10.1016/0378-5955\(84\)90052-2](https://doi.org/10.1016/0378-5955(84)90052-2)
- 987 Viswanathan, V., Shinn-Cunningham, B. G., & Heinz, M. G. (2022). Speech  
988 categorization reveals the role of early-stage temporal-coherence processing in

- 989 auditory scene analysis. *Journal of Neuroscience*, 42(2), 240-254.  
990 <https://doi.org/10.1523/JNEUROSCI.1610-21.2021>
- 991 Wasserstein, R. L., & Lazar, N. A. (2016). The asa statement on p-values: Context,  
992 process, and purpose. *The American Statistician*, 70(2), 129-133.  
993 <https://doi.org/10.1080/00031305.2016.1154108>
- 994 Waxman, S. G., & Ritchie, J. M. (1993). Molecular dissection of the myelinated axon.  
995 *Annals of Neurology*, 33(2), 121-136. <https://doi.org/10.1002/ana.410330202>
- 996 Wu, P. Z., Liberman, L. D., Bennett, K., de Gruttola, V., O'Malley, J. T., & Liberman, M.  
997 C. (2019). Primary neural degeneration in the human cochlea: Evidence for hidden  
998 hearing loss in the aging ear. *Neuroscience*, 407, 8-20.  
999 <https://doi.org/10.1016/j.neuroscience.2018.07.053>
- 1000 Xing, Y., Samuvel, D. J., Stevens, S. M., Dubno, J. R., Schulte, B. A., & Lang, H. (2012).  
1001 Age-related changes of myelin basic protein in mouse and human auditory nerve.  
1002 *PloS One*, 7(4), e34500. <https://doi.org/10.1371/journal.pone.0034500>
- 1003 Zaltz, Y., Buganim, Y., Zechoval, D., Kishon-Rabin, L., & Perez, R. (2020). Listening in  
1004 noise remains a significant challenge for cochlear implant users: Evidence from  
1005 early deafened and those with progressive hearing loss compared to peers with  
1006 normal hearing. *Journal of Clinical Medicine*, 9(5).  
1007 <https://doi.org/10.3390/jcm9051381>
- 1008 Zeng, F. G., Kong, Y. Y., Michalewski, H. J., & Starr, A. (2005). Perceptual consequences  
1009 of disrupted auditory nerve activity. *Journal of Neurophysiology*, 93(6), 3050-3063.  
1010 <https://doi.org/10.1152/jn.00985.2004>

1011 Zeng, F. G., Oba, S., Garde, S., Sininger, Y., & Starr, A. (1999). Temporal and speech  
1012 processing deficits in auditory neuropathy. *Neuroreport*, *10*(16), 3429-3435.  
1013 <https://doi.org/10.1097/00001756-199911080-00031>

1014 Zimmermann, C. E., Burgess, B. J., Nadol, J. B. (1995). Patterns of degeneration in the  
1015 human cochlear nerve. *Hear Res*, *90*(1-2), 192-201. [https://doi: 10.1016/0378-](https://doi.org/10.1016/0378-5955(95)00165-1)  
1016 [5955\(95\)00165-1](https://doi.org/10.1016/0378-5955(95)00165-1)

1017

1018

1019 **TABLE 1.** Demographic information of all study participants.  
 1020 CI24RE (CA), Freedom Contour Advance electrode array; SHL, sudden hearing loss; AN, acoustic neuroma

| Participant ID | Sex | Ear tested | Age (years) | Internal device and electrode array | Etiology of hearing loss | Electrodes tested for PLV | Electrodes tested for GDT | Speech scores included |
|----------------|-----|------------|-------------|-------------------------------------|--------------------------|---------------------------|---------------------------|------------------------|
| A1             | M   | L          | 60s         | CI512                               | SHL                      | 4, 6, 9, 12               | 4, 9                      | •                      |
| A2             | M   | L          | 60s         | CI512                               | Meniere's                | 3, 9, 12, 15              | 3, 18                     | •                      |
| A3             | F   | L          | 60s         | CI24RE (CA)                         | Hereditary               | 3, 9, 15, 21              | 3, 15                     | •                      |
| A3             | F   | R          | 60s         | CI24RE (CA)                         | Hereditary               | 3, 9, 15, 21              | 3, 21                     | •                      |
| A4             | F   | L          | 30s         | CI24RE (CA)                         | Trauma                   | 3, 9, 15, 21              | 9, 21                     | •                      |
| A5             | F   | L          | 50s         | CI532                               | Unknown                  | 4, 9, 15, 21              | 4, 21                     | •                      |
| A5             | F   | R          | 50s         | CI24RE (CA)                         | Unknown                  | 3, 9, 15, 21              | 9, 15                     | •                      |
| A6             | M   | R          | 60s         | CI522                               | Trauma                   | 6, 9, 18, 21              | 9, 15                     | •                      |
| A7             | M   | R          | 30s         | CI24RE (CA)                         | Hereditary               | 3, 9, 15, 21              | 3, 15                     | •                      |
| A8             | F   | R          | 50s         | CI24RE (CA)                         | Hereditary               | 3, 12, 15, 21             | 3, 21                     | •                      |
| A9             | F   | R          | 60s         | CI532                               | Unknown                  | 3, 9, 15, 20              | 3, 21                     | •                      |
| A10            | M   | R          | 70s         | CI532                               | Trauma                   | 3, 9, 15, 21              |                           | •                      |
| A11            | F   | L          | 70s         | CI422                               | Noise                    | 4, 9, 15, 20              | 9, 20                     | •                      |
| A12            | M   | L          | 60s         | CI632                               | Unknown                  | 3, 9, 15, 21              | 3, 21                     | •                      |
| A12            | M   | R          | 60s         | CI532                               | Unknown                  | 3, 9, 15, 20              | 3, 20                     | •                      |
| A13            | F   | L          | 70s         | CI24RE (CA)                         | Autoimmune               | 3, 7, 12, 18              | 3, 18                     | •                      |
| A14            | M   | L          | 60s         | CI532                               | AN                       | 4, 9, 15, 21              | 9, 15                     | •                      |
| A15            | F   | R          | 80s         | CI532                               | Hereditary               | 3, 7, 10, 17              | 7, 17                     | •                      |
| A16            | F   | L          | 30s         | CI532                               | Unknown                  | 3, 9, 15, 21              |                           | •                      |
| A17            | F   | L          | 50s         | CI532                               | Unknown                  | 3, 9, 15, 21              | 9, 21                     | •                      |
| A18            | F   | L          | 70s         | CI622                               | Unknown                  | 6, 9, 15, 21              |                           | •                      |
| A19            | M   | R          | 80s         | CI632                               | Unknown                  | 3, 9, 15, 21              | 3, 9                      | •                      |
| A20            | M   | R          | 50s         | CI632                               | SHL                      | 3, 9, 15, 21              |                           | •                      |
| A21            | F   | L          | 50s         | CI632                               | Unknown                  | 3, 15, 18, 21             | 15, 18                    | •                      |
| A22            | F   | R          | 70s         | CI622                               | Unknown                  | 3, 9, 15, 21              | 3, 15                     | •                      |
| A23            | M   | L          | 50s         | CI532                               | Usher                    | 3, 9, 15, 21              | 3, 9                      | •                      |
| A24            | M   | L          | 70s         | CI632                               | Unknown                  | 3, 9, 15, 21              | 3, 9                      | •                      |

1022 **Table 2.** Results of pairwise comparisons for comparing phase locking values measured at different electrode locations.

| Electrode Pair | Estimate | Standard Error | Degree of Freedom | T Ratio | <i>p</i> Value |
|----------------|----------|----------------|-------------------|---------|----------------|
| E3 vs. E9      | -0.022   | 0.021          | 30.2              | -1.025  | .736           |
| E3 vs. E15     | -0.080   | 0.023          | 26.9              | -3.463  | .009           |
| E3 vs. E21     | -0.087   | 0.031          | 30.9              | -2.865  | .035           |
| E9 vs. E15     | -0.059   | 0.016          | 27.8              | -3.622  | .006           |
| E9 vs. E21     | -0.066   | 0.028          | 33                | -2.575  | .067           |
| E15 vs. E21    | 0.007    | 0.020          | 30.9              | -0.352  | .984           |

1023



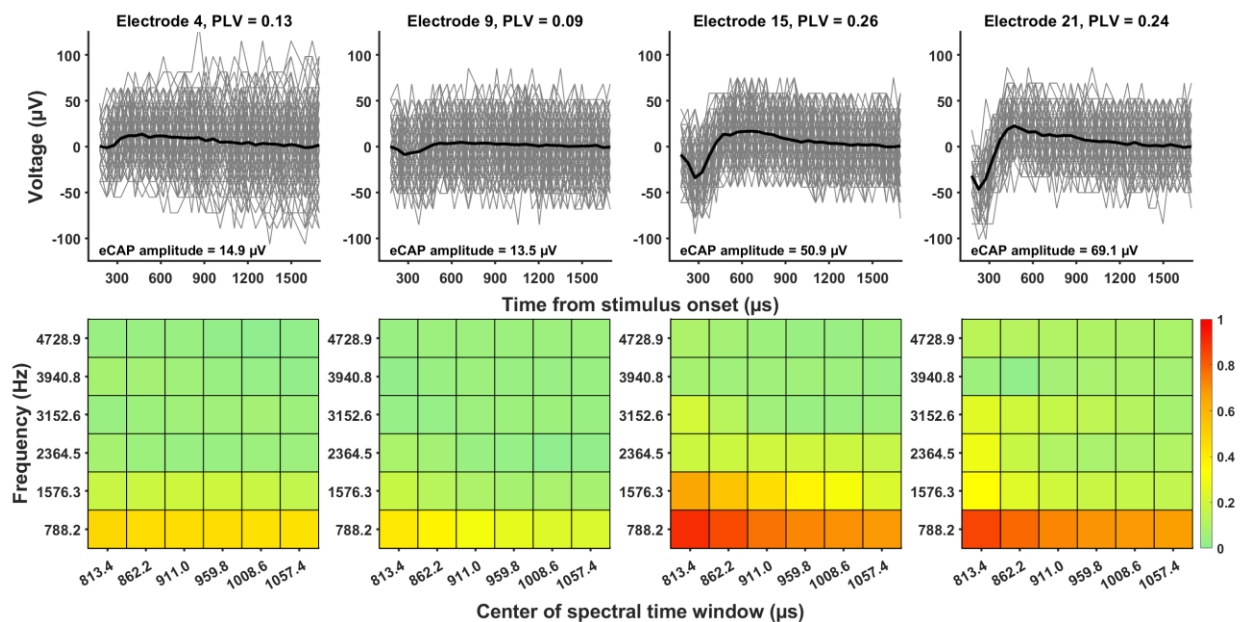

1024

1025 **Figure 1.** Representative data from participant A14 demonstrating the method for  
1026 estimating neural synchrony at the level of the cochlear nerve at individual electrode  
1027 locations in cochlear implant users. Top panels: Recordings of electrically evoked  
1028 compound action potentials (eCAPs) for individual trials (gray lines) with the across-trial  
1029 average (black line). The amplitude of the across-trial average is also provided. Bottom  
1030 panels: Heat maps indicating the phase-locking value (PLV) as a function of time and  
1031 frequency.

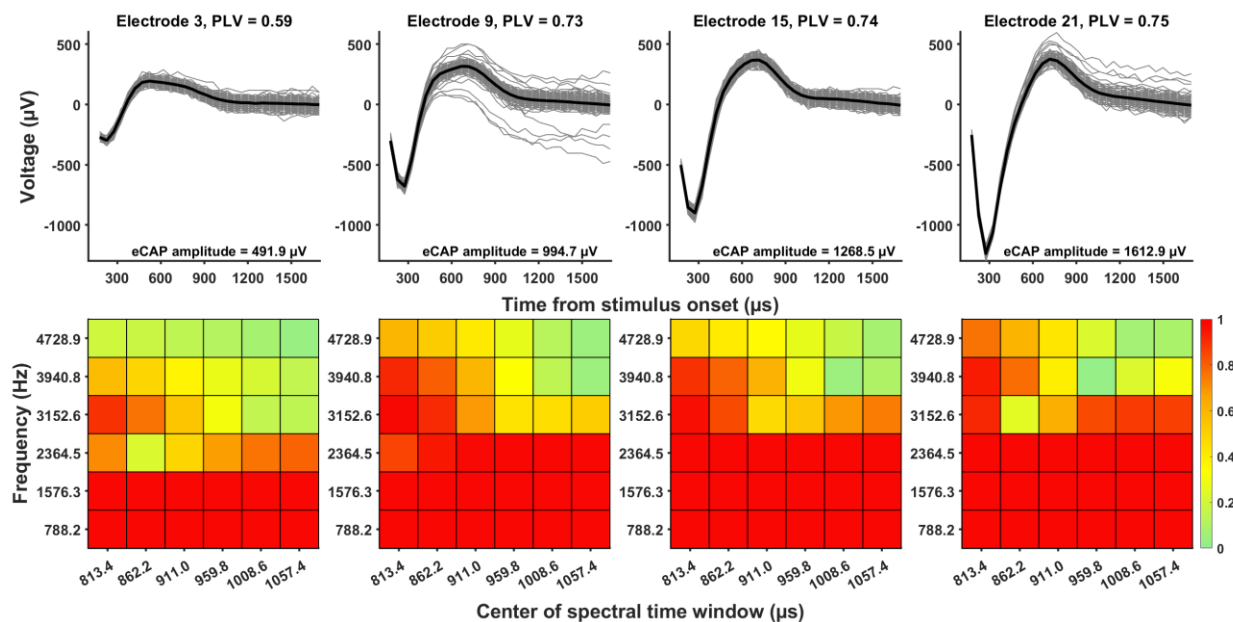

1032  
1033 **Figure 2.** Representative data recorded in the right ear of participant A3 demonstrating  
1034 the method for estimating neural synchrony at the level of the cochlear nerve at individual  
1035 electrode locations in cochlear implant users. Top panels: Recordings of electrically  
1036 evoked compound action potentials (eCAPs) for individual trials (gray lines) with the  
1037 across-trial average (black line). The amplitude of the across-trial average is also  
1038 provided. Bottom panels: Heat maps indicating the phase-locking value (PLV) as a  
1039 function of time and frequency.

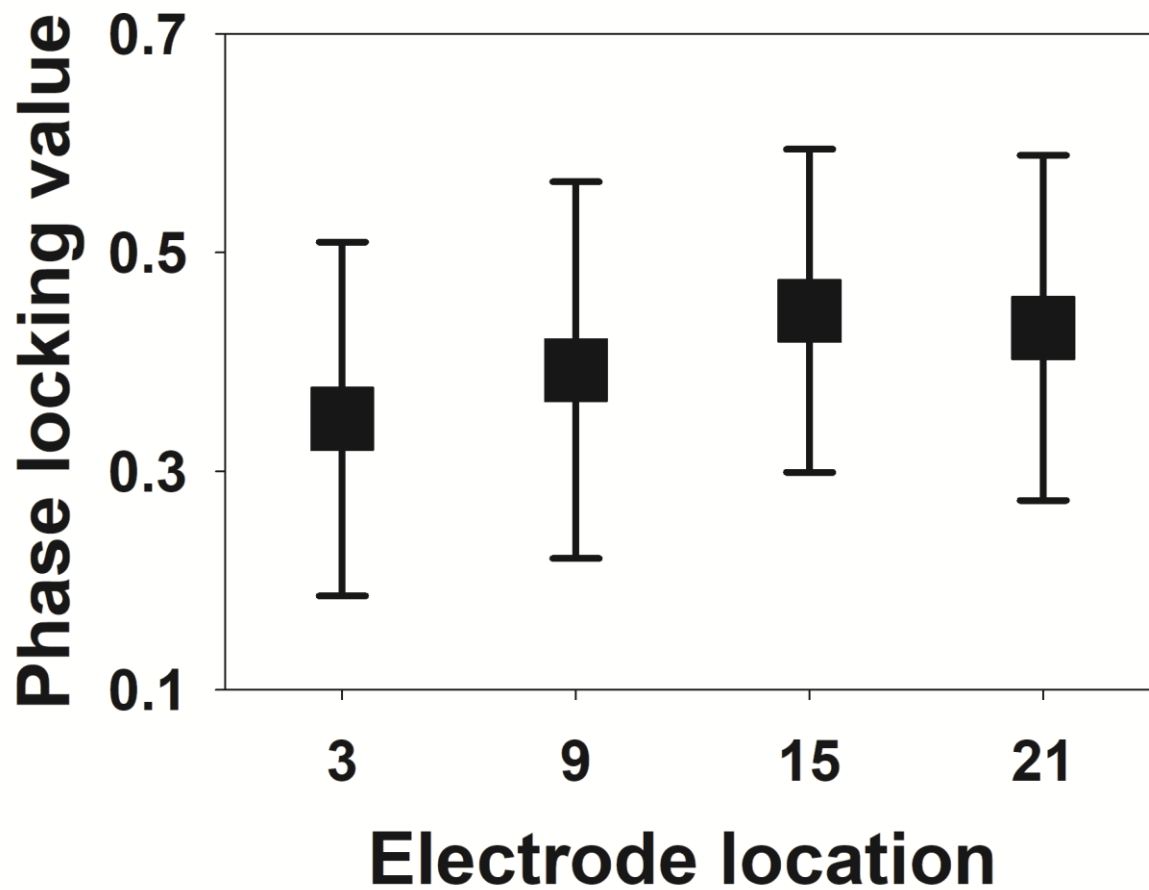

1040

1041 **Figure 3.** The means and standard deviations of phase-locking values measured at four  
1042 electrode locations in 24 adult cochlear implant users (27 ears).

1043

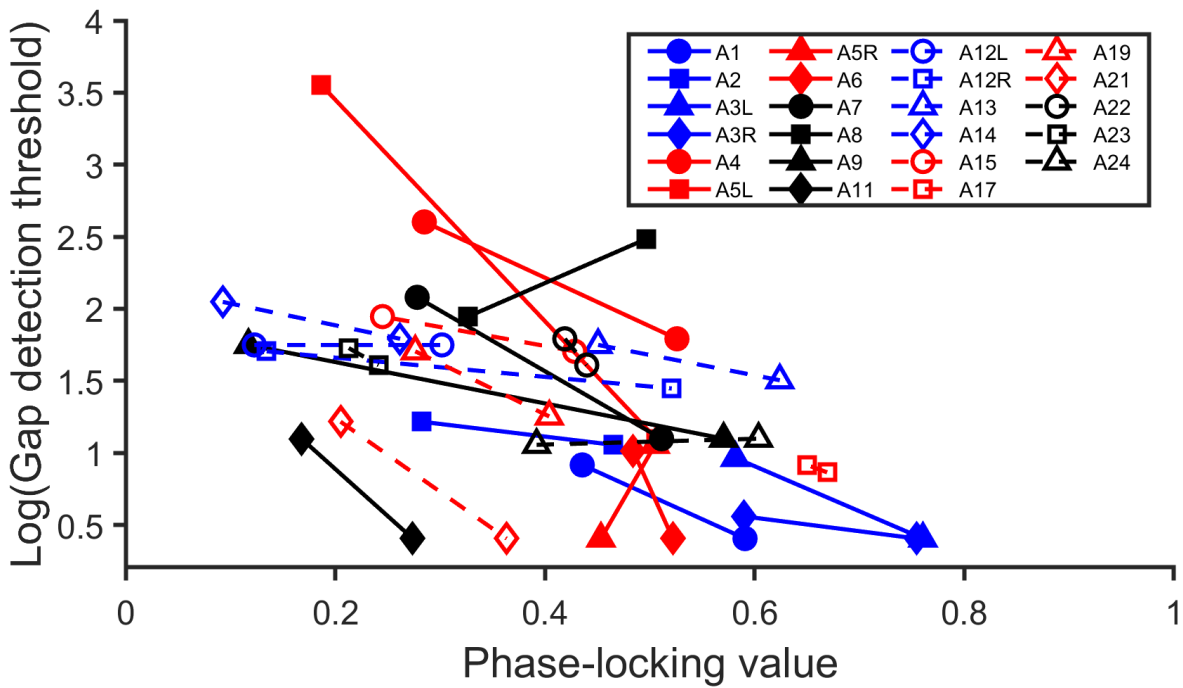

1044

1045 **Figure 4.** Phase-locking values and psychophysical gap detection thresholds measured  
1046 at two electrode locations in each of 23 implanted ears of 20 participants. Lines connect  
1047 the data measured at the two electrode locations tested in the same ear.

1048

1049

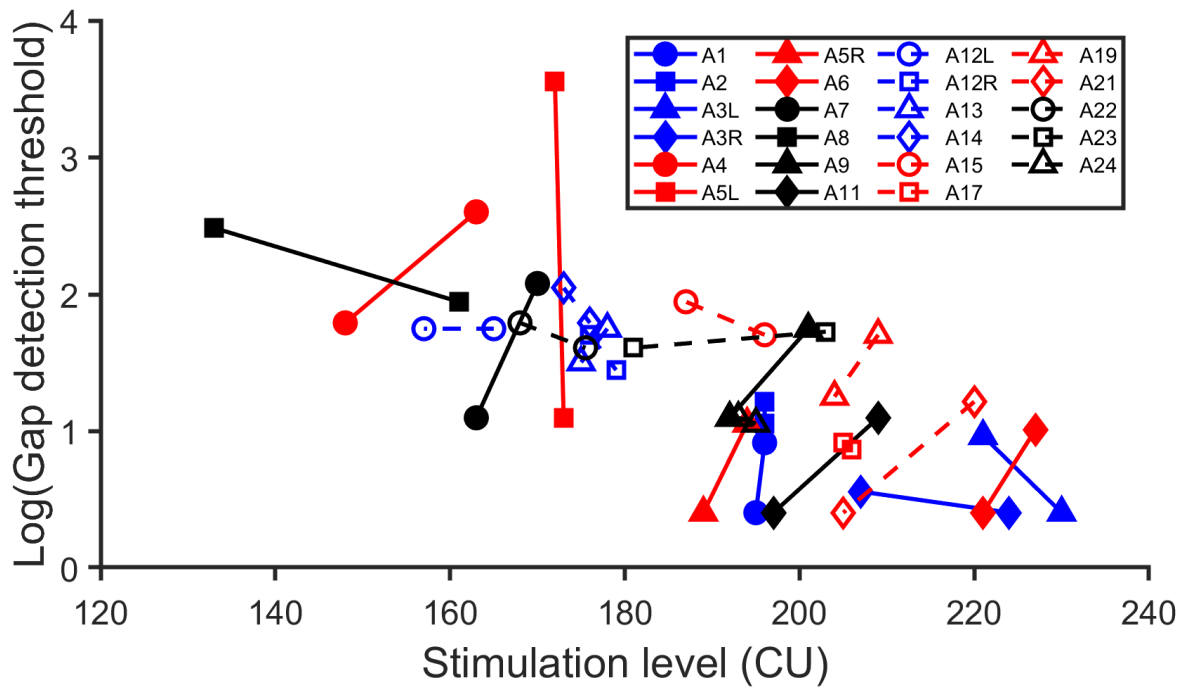

1050

1051 **Figure 5.** Stimulation levels and psychophysical gap detection thresholds measured at  
1052 two electrode locations in each of 23 implanted ears of 20 participants. Lines connect the  
1053 data measured at the two electrode locations tested in the same ear.

1054

1055

1056

1057

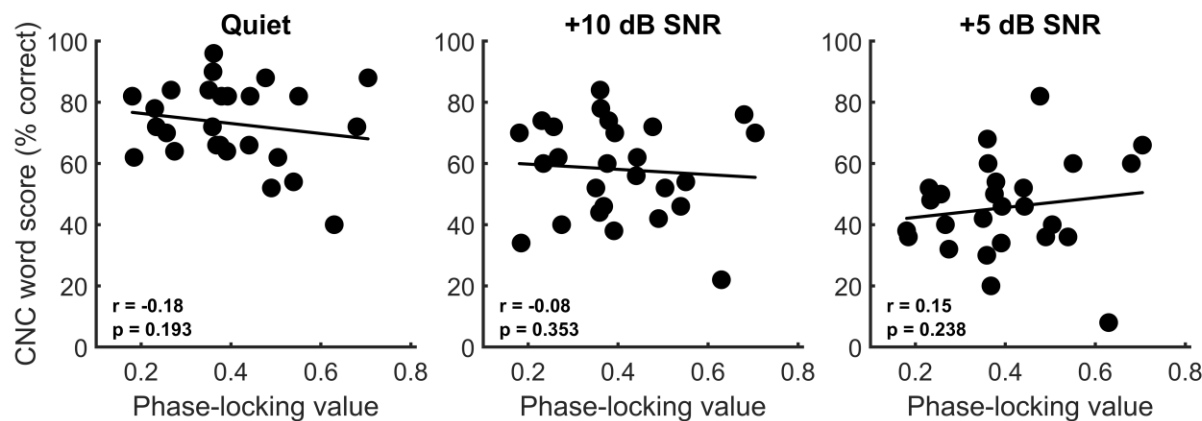

1058  
1059 **Figure 6.** Consonant-Nucleus-Consonant (CNC) word scores measured in quiet and in  
1060 two noise conditions as a function of the phase-locking value averaged across electrode  
1061 locations for 23 adult cochlear implant users (26 ears). The best fit line across all 26 data  
1062 points is illustrated with a solid line. The results from Pearson's correlation analysis are  
1063 also provided in each panel.

1064

1065

1066

1067

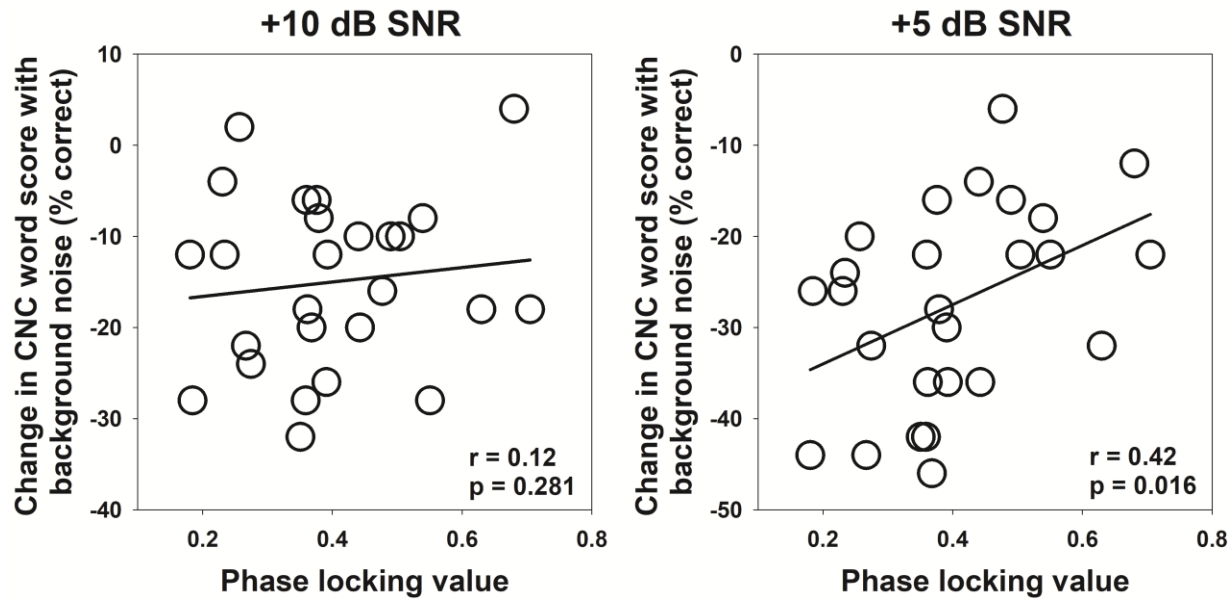

1068

1069 **Figure 7.** The change in Consonant-Nucleus-Consonant (CNC) word scores with the  
1070 addition of background noise as a function of the phase-locking value averaged across  
1071 electrode locations. The best fit line across all 26 data points is illustrated with a solid line.  
1072 The results from Pearson's correlation analysis are also provided in each panel.
