# Supplementary material for: Peripheral neural synchrony in post-lingually deafened adult cochlear implant users
Source: bioRxiv or medRxiv preprint supplement (doi:10.1101/2023.07.07.23292369), 2024-02-16
Supplement: Supplementary file [file media-1.pdf]

**Table A 1. Three additional sets of parameters used to calculate the phase locking value (PLV)**

| Parameter Set | Frequency Range (Hz) | Number of Linearly Spaced Frequencies | Number of Samples Included in Each Frame | Frame Size in Time ( $\mu\text{s}$ ) | Number of Frames Used for Calculating the Averaged PLV | The Time Window Used for Calculating the Averaged PLV ( $\mu\text{s}$ ) |
|---------------|----------------------|---------------------------------------|------------------------------------------|--------------------------------------|--------------------------------------------------------|-------------------------------------------------------------------------|
| I             | 1280.8 – 3201.9      | 4                                     | 16                                       | 780.8                                | 6                                                      | 179 – 1203.8                                                            |
| II            | 1280.8 – 4482.6      | 6                                     | 16                                       | 780.8                                | 6                                                      | 179 – 1203.8                                                            |
| III           | 683.1– 4781.5        | 13                                    | 30                                       | 1464                                 | 2                                                      | 179 – 1561.6                                                            |
