# Supplementary material for: Peripheral neural synchrony in post-lingually deafened adult cochlear implant users
Source: bioRxiv or medRxiv preprint supplement (doi:10.1101/2023.07.07.23292369), 2024-02-16
Supplement: Supplementary file [file media-4.pdf]

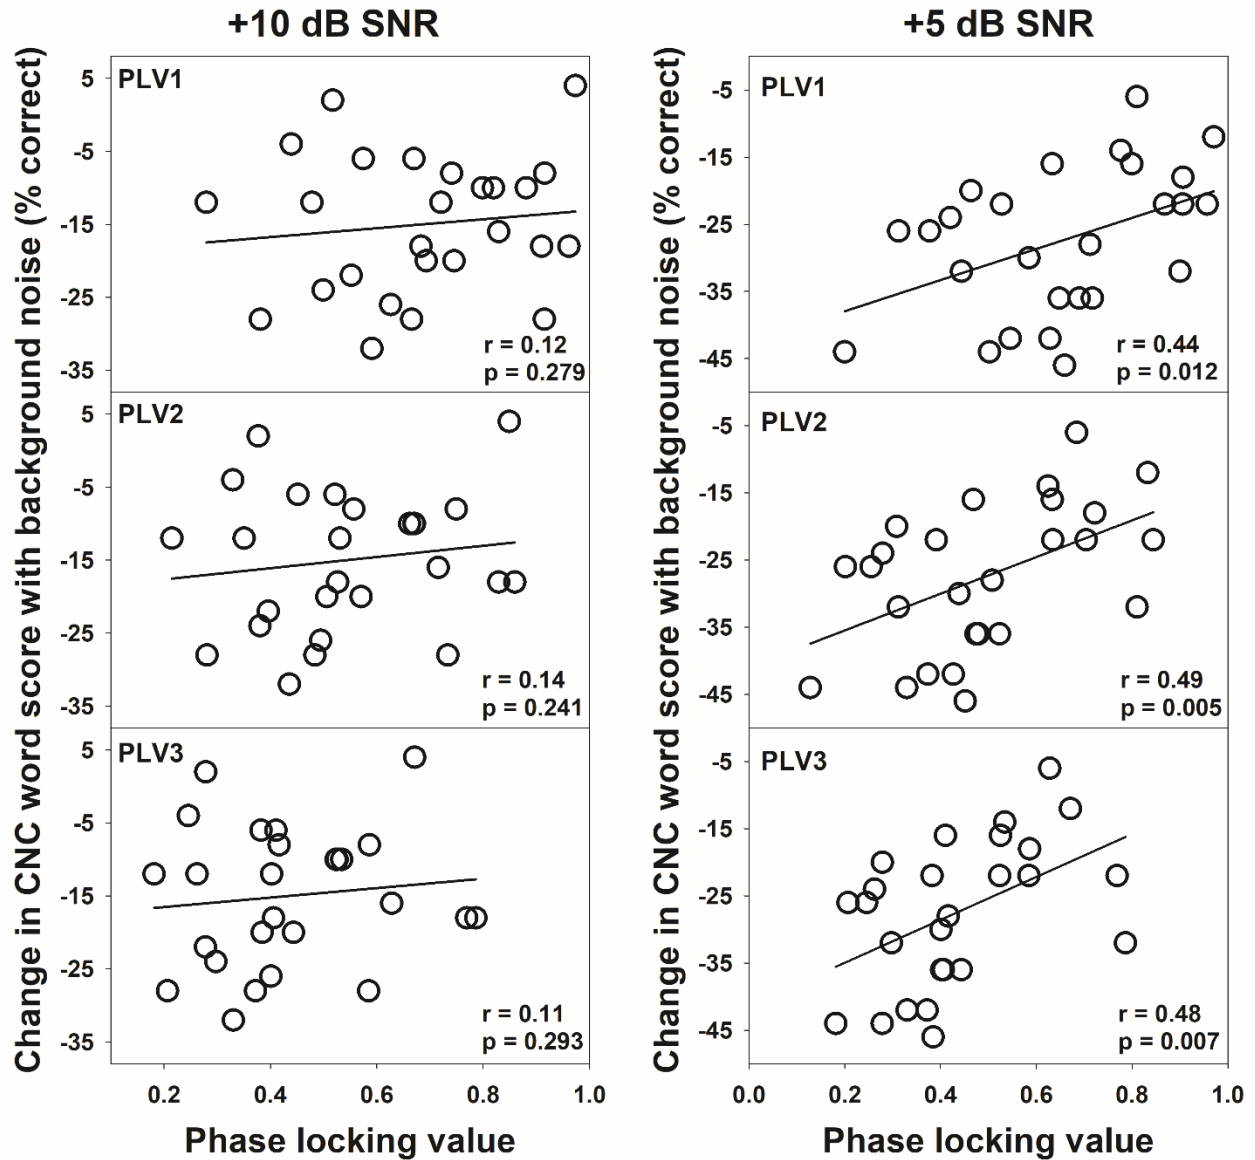

**Figure C1.** The change in Consonant-Nucleus-Consonant (CNC) word scores with the addition of background noise as a function of the averaged phase-locking value (PLV) across electrode locations. PLVs calculated using different sets of parameters are indicated in different rows (PLV1, PLVs calculated using Parameter set I; PLV2, PLVs calculated using Parameter set II; PLV3, PLVs calculated using Parameter set III). Each column indicates results measured in each testing condition. The best fit line across all

26 data points is illustrated with a solid line. The results from Pearson's correlation analysis are also provided in each panel.
