# Supplementary material for: Peripheral neural synchrony in post-lingually deafened adult cochlear implant users
Source: bioRxiv or medRxiv preprint supplement (doi:10.1101/2023.07.07.23292369), 2024-02-16
Supplement: Supplementary file [file media-5.pdf]

**Table B 1. Results for phase locking values (PLVs) calculated using three additional sets of parameters.** PLV1, PLVs calculated using Parameter set I; PLV2, PLVs calculated using Parameter set II; PLV3, PLVs calculated using Parameter set III; STD, standard deviation; GDT, gap detection threshold.

|      | Range (mean, STD)        | Electrode Effect                | Level Effect                | Effect on GDT               |
|------|--------------------------|---------------------------------|-----------------------------|-----------------------------|
| PLV1 | 0.13 – 1.0 (0.69, 0.25)  | $\chi^2_{(3)} = 14.72; p < .01$ | $t_{(101)} = 2.30; p = .02$ | $t_{(42)} = -3.20; p < .01$ |
| PLV2 | 0.11 – 0.93 (0.55, 0.23) | $\chi^2_{(3)} = 15.58; p < .01$ | $t_{(101)} = 3.07; p < .01$ | $t_{(42)} = -3.25; p < .01$ |
| PLV3 | 0.10 – 0.84 (0.44, 0.20) | $\chi^2_{(3)} = 15.07; p < .01$ | $t_{(101)} = 3.49; p < .01$ | $t_{(42)} = -3.60; p < .01$ |
