# Supplementary material for: Peripheral neural synchrony in post-lingually deafened adult cochlear implant users
Source: bioRxiv or medRxiv preprint supplement (doi:10.1101/2023.07.07.23292369), 2024-02-16
Supplement: Supplementary file [file media-6.pdf]

**Table C1. Results of pairwise comparisons for comparing phase locking values (PLVs) measured at different electrode locations.** PLV1, PLVs calculated using Parameter set I; PLV2, PLVs calculated using Parameter set II; PLV3, PLVs calculated using Parameter set III.

|      | Electrode Pair | Estimate | Standard Error | Degree of Freedom | T Ratio | <i>p</i> Value |
|------|----------------|----------|----------------|-------------------|---------|----------------|
| PLV1 | E3 vs. E9      | -0.05    | 0.03           | 29.0              | -1.16   | .39            |
|      | E3 vs. E15     | -0.13    | 0.04           | 30.3              | -3.48   | <.01           |
|      | E3 vs. E21     | -0.12    | 0.05           | 40.0              | -2.46   | .08            |
|      | E9 vs. E15     | -0.09    | 0.02           | 27.2              | -3.51   | <.01           |
|      | E9 vs. E21     | -0.08    | 0.04           | 36.5              | -1.91   | .24            |
|      | E15 vs. E21    | 0.00     | 0.03           | 30.8              | 0.24    | .99            |
| PLV2 | E3 vs. E9      | -0.03    | 0.02           | 30.0              | -1.42   | .50            |
|      | E3 vs. E15     | -0.11    | 0.03           | 29.7              | -3.59   | .01            |
|      | E3 vs. E21     | -0.11    | 0.04           | 37.5              | -2.59   | .06            |
|      | E9 vs. E15     | -0.08    | 0.02           | 27.2              | -3.57   | .01            |
|      | E9 vs. E21     | -0.08    | 0.04           | 35.4              | -2.15   | .16            |
|      | E15 vs. E21    | 0.00     | 0.03           | 31.2              | 0.10    | 1.00           |
| PLV3 | E3 vs. E9      | -0.02    | 0.02           | 30.1              | -1.03   | .73            |
|      | E3 vs. E15     | -0.08    | 0.02           | 28.2              | -3.38   | .01            |
|      | E3 vs. E21     | -0.09    | 0.03           | 33.4              | -2.67   | .05            |
|      | E9 vs. E15     | -0.06    | 0.02           | 26.6              | -3.37   | .01            |
|      | E9 vs. E21     | -0.07    | 0.03           | 33.1              | -2.29   | .12            |
|      | E15 vs. E21    | 0.00     | 0.02           | 30.9              | 0.22    | 1.00           |
